# Supplementary material for: Population-level analysis of Blastocystis subtype prevalence and variation in the human gut microbiota
Source: PubMed Central journal article supplement — Gut. 2018 Aug 31;68(7):1180–9. doi: 10.1136/gutjnl-2018-316106 (PMC6582744; doi:10.1136/gutjnl-2018-316106), 2018-08-31
Supplement: gutjnl-2018-316106supp001.pdf [file gutjnl-2018-316106supp001.pdf]

# **Population-level analysis of *Blastocystis* subtype prevalence and variation in the human gut microbiota**

Raul Y. Tito<sup>1,2,3</sup>, Samuel Chaffron<sup>4</sup>, Clara Caenepeel<sup>5</sup>, Gipsi Lima-Mendez<sup>1,2</sup>, Jun Wang<sup>1,2</sup>, Sara Vieira-Silva<sup>1,2</sup>, Gwen Falony<sup>1,2</sup>, Falk Hildebrand<sup>6</sup>, Youssef Darzi<sup>1,2</sup>, Leen Rymenans<sup>1,2</sup>, Chloë Verspecht<sup>1,2</sup>, Peer Bork<sup>6,7,8</sup>, Severine Vermeire<sup>5</sup>, Marie Joossens<sup>1,2</sup>, Jeroen Raes<sup>1,2‡</sup>

<sup>1</sup>Department of Microbiology and Immunology, Rega Institute, KU Leuven – University of Leuven, Herestraat 49, B-3000 Leuven, Belgium; <sup>2</sup>VIB, Center for Microbiology, Herestraat 49, B-3000 Leuven, Belgium; <sup>3</sup>Research Group of Microbiology, Department of Bioengineering Sciences, Vrije Universiteit Brussel, Pleinlaan 2, B-1050 Brussels, Belgium. <sup>4</sup>Laboratoire des Sciences du Numérique de Nantes (LS2N), CNRS UMR 6004 – Université de Nantes, École Centrale de Nantes, IMT Atlantique, 2 rue de la Houssinière, 44322 Nantes, France. <sup>5</sup>Translational Research Center for Gastrointestinal Disorders (TARGID), KU Leuven, B-3000 Leuven, Belgium. <sup>6</sup>European Molecular Biology Laboratory, 69117 Heidelberg, Germany. <sup>7</sup>Max Delbrück Centre for Molecular Medicine, 13125 Berlin, Germany. <sup>8</sup>Department of Bioinformatics, University of Würzburg, 97074 Würzburg, Germany.

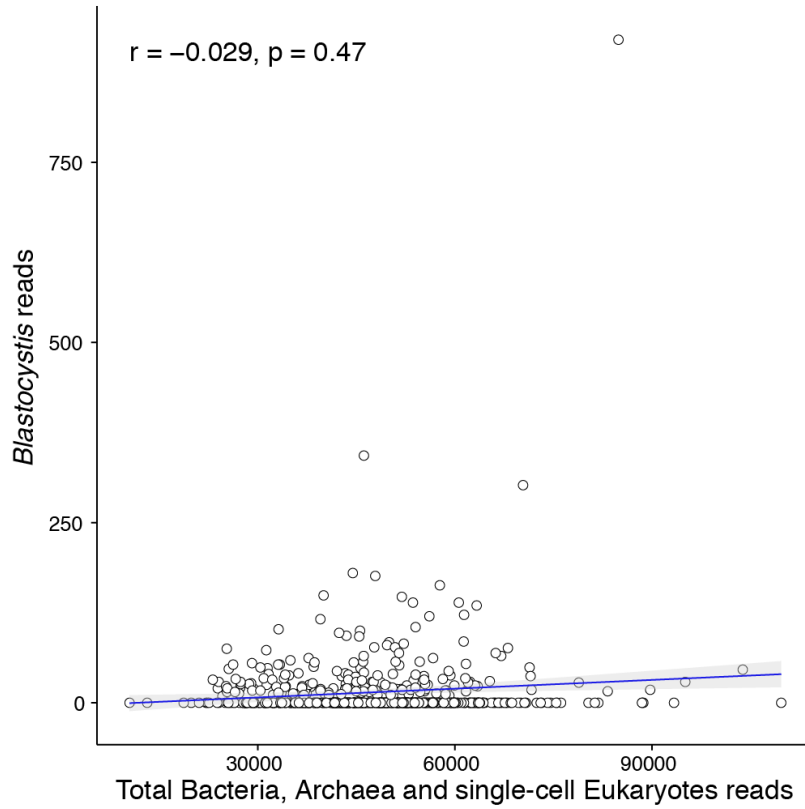

**Supplementary Figure S1.** Correlation of *Blastocystis* reads and total number of reads per sample. There is no correlation between number of reads assigned to *Blastocystis* and the total number of reads generated using a set of primers for 16S rRNA and 18S rRNA genes.

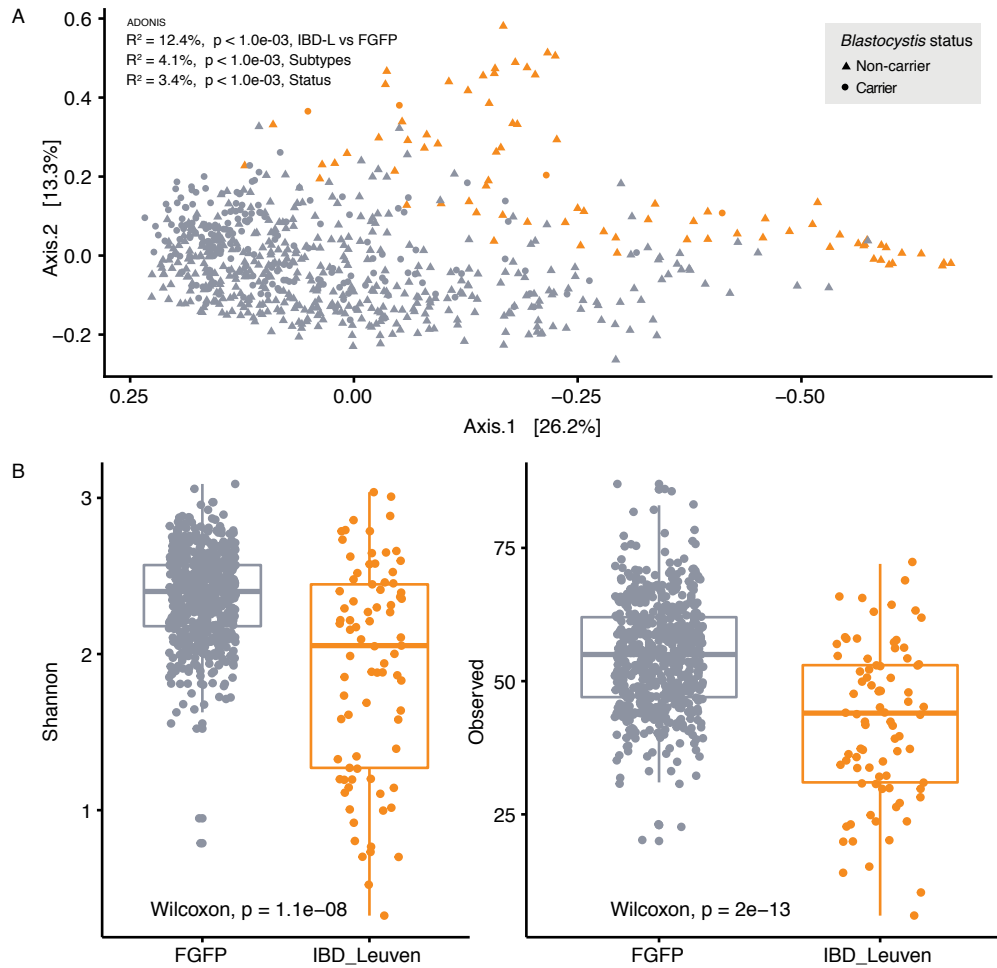

**Supplementary Figure S2.** Microbial community variation in the IBD-L (IBD Leuven cohort). A) Principal coordinate analysis (PCoA) of genus-level Bray-Curtis dissimilarity of the bacterial and archaeal fraction of IBD-L and FGFP. The percentage of variation explained by the two first PCoA dimensions are reported on the axes. B) Shannon diversity index (SDI) and Observed genus richness across IBD-L and FGFP. IBD-L patients have lower SDI and richness compared to FGFP. The body of the box plot represents the first and third quartiles of the distribution, and the median line. The whiskers extend from the quartiles to the last data point within  $1.5 \times \text{IQR}$ , with outliers beyond.

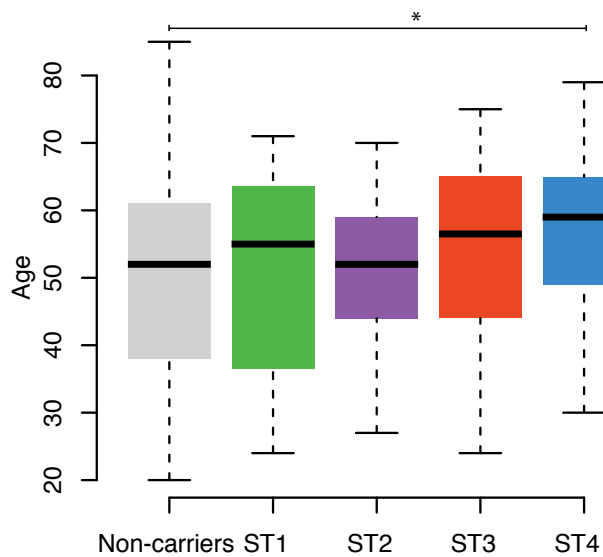

**Supplementary Figure S3.** *Blastocystis* Subtype 4 carriers are significantly older than *Blastocystis* non-carriers. Wilcoxon test, (FDR) (\*) FDR = 7.1e-05.

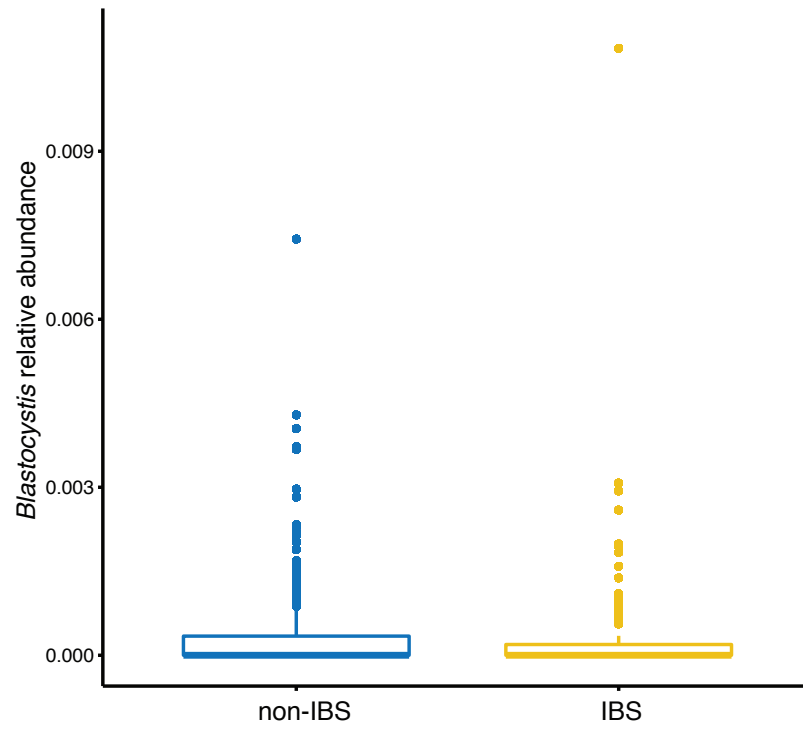

**Supplementary Figure S4.** *Blastocystis* relative abundances are not significantly different between IBS and non-IBS individuals (Wilcoxon test,  $W = 32518$ ,  $p$ -value = 0.50).

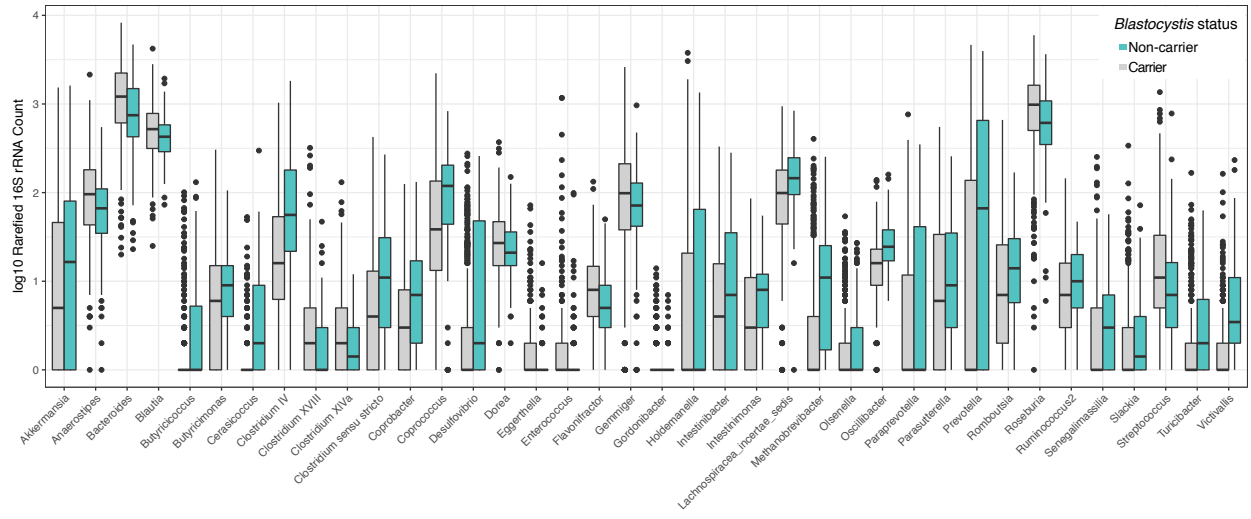

**Supplementary Figure S5.** Relative abundances of 38 genera exhibiting significant differential abundance between *Blastocystis* carriers and non-carriers (Kruskal–Wallis test and FDR on genera after filtering by prevalence of 20 % and removing unclassified (unknown) genera (FDR < 0.05)).

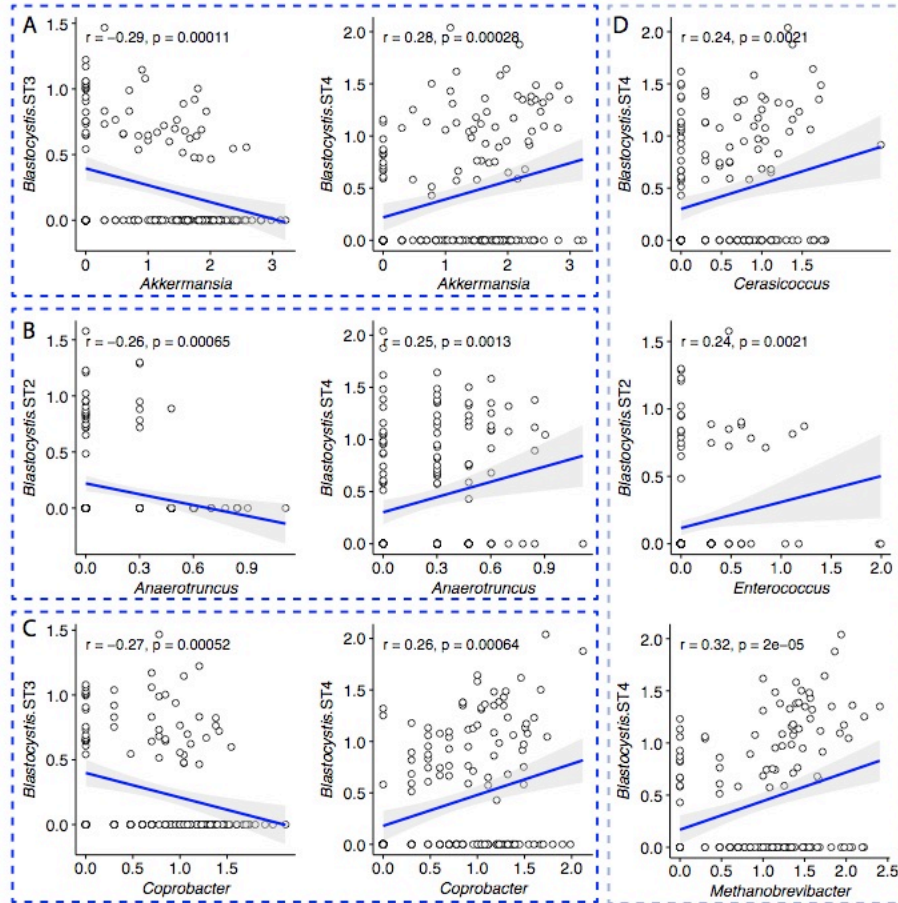

**Supplementary Figure S6.** Association between *Blastocystis* subtypes and Bacteria and Archaea relative abundance. Antagonistic correlations between *Blastocystis* subtypes are presented in A, B, and C. Additional correlations are presented in D. (Spearman correlation, FDR < 0.1).

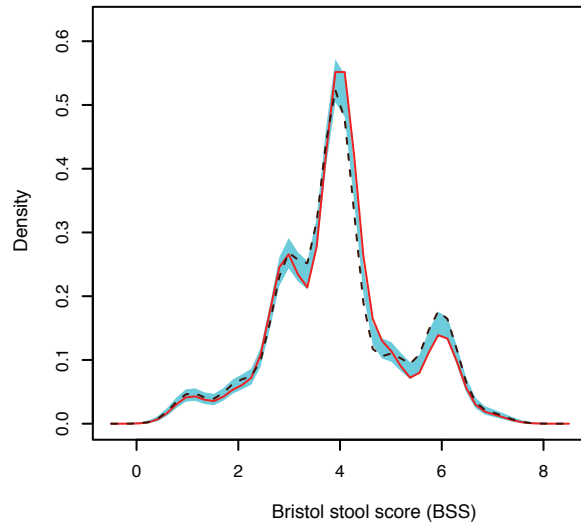

**Supplementary Figure S7.** Density distributions of BSS in the full FGFP cohort (n=1106, black dashed line) and the analysed subset cohort (n=616, red line).



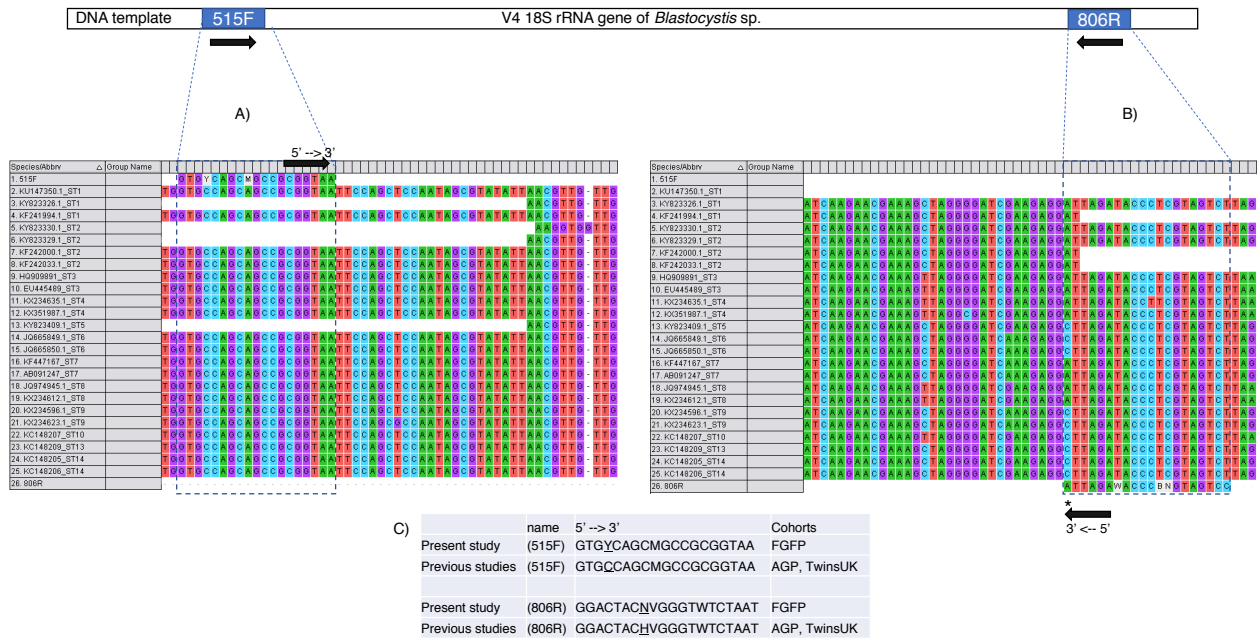

**Supplementary Figure S8.** Universal primers 515F and 806R Bacteria/Archaea aligned with the different *Blastocystis* subtypes. A) The 515F primer exhibits a perfect alignment with several *Blastocystis* subtypes sequences, including the nine subtypes identified in humans and three other subtypes reported in other vertebrates. B) The 806R primer shows a good alignment with several *Blastocystis* subtypes sequences, including the nine subtypes identified in humans and three other subtypes reported in other vertebrates. Contrary to what is predicted using in-silico tools, the mismatching A in the 3' end of 806R, observed in some *Blastocystis* subtypes (ST5, ST6 and ST9), does not prevent alignment and amplification, as demonstrated by the identification of two of these subtypes (ST6 and ST9) using the same primers in the AGP data (Figure 1, Supplementary Table S4). All *Blastocystis* sequences were retrieved from the NCBI Nucleotide database and aligned using the MEGA7 software<sup>54</sup>. C) The primers used for our study presented three differences with those used for the AGP and TwinUK studies. In the 515F, a C (cytosine) was replaced by a Y (cytosine or

thymine), while in the 806R, a degenerated H (adenine, cytosine and thymine) was substituted by a degenerated N (adenine, cytosine, guanine and thymine).

## LotuS scripts and settings.

#####Bacteria, Archaea and Eukaryotes LotuS run (genus)

```
{PATH}/lotus.pl -i {Fastq_files}/ -m {PATH}/map_file.txt -o out_Directory -s  
{PATH}/sdm_miSeqFR.txt -c {PATH}/IOTUs.cfg -p miSeq  
{PATH}/lotus.pl -i {Fastq_files}/ -m {PATH}/map_file.txt -o out_Directory -s  
{PATH}/sdm_miSeqFR.txt -c {PATH}/IOTUs.cfg -p miSeq -refDB PR2 -simBasedTaxo 1 -  
redoTaxOnly 1 -threads 8
```

##### sdm\_miSeqFR.txt

```
#sdm options file to control sequence quality filtering,  
demultiplexing and preparation (can also be used without  
demultiplexing)  
#* indicates alternative quality filtering options, saved in  
*.add.fna etc. files separately from initial quality filtered  
dataset  
#sequence length refers to sequence length AFTER removal of  
Primers, Barcodes and trimming. this ensures that downstream  
analysis tools will have appropriate sequence information  
#options with a star in front are lenient parameters for mid  
qual sequences (only used for estimating OTU abundance, not for  
OTU building itself).  
minSeqLength 170  
maxSeqLength 1000  
minAvgQuality 27  
*minSeqLength 170  
*minAvgQuality 20  
#truncate total Sequence length to X (length after Barcode,  
Adapter and Primer removals, set to -1 to deactivate)  
TruncateSequenceLength 170  
  
#Ambiguous bases in Sequence  
maxAmbiguousNT 0  
*maxAmbiguousNT 1  
  
#sequence is discarded if a homonucleotide run in sequence is  
longer  
maxHomonucleotide 8  
  
#Filter whole sequence if one window of quality scores is below  
average  
QualWindowWidth 50  
QualWindowThreshold 25
```

```
#Trim the end of a sequence if a window falls below quality
threshold. Useful for removing low quality trailing ends of
sequence
TrimWindowWidth      20
TrimWindowThreshhold 25

#Probabilistic max number of accumulated sequencing errors.
After this length, the rest of the sequence will be deleted.
Complimentary to TrimWindowThreshhold. (-1) deactivates this
option.
maxAccumulatedError 0.75
*maxAccumulatedError -1
#Binomial error model of expected errors per sequence (see
https://github.com/fpusan/moira), to deactivate, set
BinErrorModelAlpha to -1
BinErrorModelMaxExpError 2.5
BinErrorModelAlpha 0.005

#Max Barcode Errors
maxBarcodeErrs 0
maxPrimerErrs 0

#keep Barcode / Primer Sequence in the output fasta file - in a
normal 16S analysis this should be deactivated (0) for Barcode
and de-activated (0) for primer
keepBarcodeSeq 0
keepPrimerSeq 0

#set fastqVersion to 1 if you use Sanger, Illumina 1.8+ or NCBI
SRA files. Set fastqVersion to 2, if you use Illumina 1.3+ -
1.7+ or Solexa fastq files. "auto" will look for typical
characteristics of either of these and choose the quality offset
score automatically.
fastqVersion auto

#if one or more files have a technical adapter still included
(e.g. TCAG 454) this can be removed by setting this option
TechnicalAdapter

#delete X NTs (e.g. if the first 5 bases are known to have
strange biases)
TrimStartNTs 0
```

```
#correct PE header format (1/2) this is to accommodate the
illumina miSeq paired end annotations 2="@XXX 1:0:4" instead of
1="@XXX/1". Note that the format will be automatically detected
PEheaderPairFmt      1
```

```
#sets if sequences without match to reverse primer
(ReversePrimer) will be accepted (T=reject ; F=accept all);
default=F
```

```
RejectSeqWithoutRevPrim  T
```

```
.*RejectSeqWithoutRevPrim      F
```

```
#sets if sequences without a forward (LinkerPrimerSequence)
primer will be accepted (T=reject ; F=accept all); default=F
```

```
RejectSeqWithoutFwdPrim  T
```

```
.*RejectSeqWithoutFwdPrim      F
```

```
#this option should be "T" if your amplicons are possibly
shorter than a single read in a paired end sequencing run (e.g.
if the 16S amplicon length is 200bp in a 250x2 miSeq run, set
this to "T"). This option increases runtime by 10%, if in doubt
just set to "T". *Requires* LinkerPrimerSequence and
ReversePrimer to be defined in mapping file.
```

```
AmpliconShortPE      F
```

```
#options for difficulties during sequencing library construction
#checks if pair1 and pair2 were switched (ignore if single read
data)
```

```
CheckForMixedPairs  F
```

```
#checks if whole amplicon was reverse-transcribed sequenced (not
switched, just reverse translated)
```

```
CheckForReversedSeqs      F
```

```
##### Eukaryotes LotuS run (OTUs)
/{PATH}/lotus.pl -i /{Fastq_files}/ -m /{PATH}/map_file.txt -o out_Directory -s
/{PATH}/sdm_miSeqFR.130.txt -c /{PATH}/LOTUs.cfg -p miSeq -refDB PR2 -simBasedTaxo
1 -threads 8
```

```
##### sdm_miSeqFR.130.txt
```

```
#sdm options file to control sequence quality filtering,
demultiplexing and preparation (can also be used without
demultiplexing)
#* indicates alternative quality filtering options, saved in
*.add.fna etc. files separately from initial quality filtered
dataset
#sequence length refers to sequence length AFTER removal of
Primers, Barcodes and trimming. this ensures that downstream
analysis tools will have appropriate sequence information
#options with a star in front are lenient parameters for mid
qual sequences (only used for estimating OTU abundance, not for
OTU building itself).
minSeqLength 130
maxSeqLength 1000
minAvgQuality 27
*minSeqLength 130
*minAvgQuality 20
#truncate total Sequence length to X (length after Barcode,
Adapter and Primer removals, set to -1 to deactivate)
TruncateSequenceLength 130

#Ambiguous bases in Sequence
maxAmbiguousNT 0
*maxAmbiguousNT 1

#sequence is discarded if a homonucleotide run in sequence is
longer
maxHomonucleotide 8

#Filter whole sequence if one window of quality scores is below
average
QualWindowWidth 50
QualWindowThreshold 25

#Trim the end of a sequence if a window falls below quality
threshold. Useful for removing low quality trailing ends of
sequence
TrimWindowWidth 20
TrimWindowThreshold 25
```

```
#Probabilistic max number of accumulated sequencing errors.
After this length, the rest of the sequence will be deleted.
Complimentary to TrimWindowThreshold. (-1) deactivates this
option.
maxAccumulatedError 0.75
*maxAccumulatedError -1
#Binomial error model of expected errors per sequence (see
https://github.com/fpusan/moira), to deactivate, set
BinErrorModelAlpha to -1
BinErrorModelMaxExpError 2.5
BinErrorModelAlpha 0.005

#Max Barcode Errors
maxBarcodeErrs 0
maxPrimerErrs 0

#keep Barcode / Primer Sequence in the output fasta file - in a
normal 16S analysis this should be deactivated (0) for Barcode
and de-activated (0) for primer
keepBarcodeSeq 0
keepPrimerSeq 0

#set fastqVersion to 1 if you use Sanger, Illumina 1.8+ or NCBI
SRA files. Set fastqVersion to 2, if you use Illumina 1.3+ -
1.7+ or Solexa fastq files. "auto" will look for typical
characteristics of either of these and choose the quality offset
score automatically.
fastqVersion auto

#if one or more files have a technical adapter still included
(e.g. TCAG 454) this can be removed by setting this option
TechnicalAdapter

#delete X NTs (e.g. if the first 5 bases are known to have
strange biases)
TrimStartNTs 0

#correct PE header format (1/2) this is to accommodate the
illumina miSeq paired end annotations 2="@XXX 1:0:4" instead of
1="@XXX/1". Note that the format will be automatically detected
PEheaderPairFmt 1

#sets if sequences without match to reverse primer
(ReversePrimer) will be accepted (T=reject ; F=accept all);
default=F
```

```
RejectSeqWithoutRevPrim  T
#*RejectSeqWithoutRevPrim      F
#sets if sequences without a forward (LinkerPrimerSequence)
primer will be accepted (T=reject ; F=accept all); default=F
RejectSeqWithoutFwdPrim  T
#*RejectSeqWithoutFwdPrim      F

#this option should be "T" if your amplicons are possibly
shorter than a single read in a paired end sequencing run (e.g.
if the 16S amplicon length is 200bp in a 250x2 miSeq run, set
this to "T"). This option increases runtime by 10%, if in doubt
just set to "T". *Requires* LinkerPrimerSequence and
ReversePrimer to be defined in mapping file.
AmpliconShortPE          F

#options for difficulties during sequencing library construction
#checks if pair1 and pair2 were switched (ignore if single read
data)
CheckForMixedPairs      F
#checks if whole amplicon was reverse-transcribed sequenced (not
switched, just reverse translated)
CheckForReversedSeqs    F
```



**Additional file 1**

**Table S1 -- Sequencing data and sample information. FGFP and IBD-L cohorts.**

**Table S2 -- Taxonomic annotation of eukaryotic OTUs using LotuS and BLAST.**

**Table S3 -- Abundance table of Blastocystis subtype OTUs.**

**Table S4 -- UK Twin micro-eukaryotic data (Samples positives for Blastocystis 102, with at least 2 reads).**

**Table S5 -- UK Twin micro-eukaryotic data (Samples positives for Blastocystis 138).**

**Table S6 -- Blastocystis status (Carriers and non-carriers) and phenotypic microbiome covariates (Wilcoxon test).**

**Table S7 -- Blastocystis Subtypes (Non-carriers and different subtypes) and age (Pairwise comparisons using Wilcoxon test).**

**Table S8 -- Bacterial and archaeal genera with distinct relative abundance distributions (Wilcoxon test).**

**Table S9 -- Genera differentially associated to Blastocystis subtypes (Kruskal-Wallis and Wilcoxon tests).**

**Table S10 -- Cooccurrence analysis network.**

**Table S11 -- Distance based redundancy analysis (dbRDA) results.**

**Column Description****Table S1**

|                                         |                                                        |
|-----------------------------------------|--------------------------------------------------------|
| Unique.ID                               | Sample ID                                              |
| Total.Reads.Archaea.Bacteria.Eukaryotes | Total Reads                                            |
| Pentatriconomas.Reads                   | Reads assigned to Pentatriconomas                      |
| Entamoeba.Reads                         | Reads assigned to Entamoeba                            |
| Blastocystis.Reads                      | Reads assigned to Blastocystis                         |
| BlastocystisRA                          | Blastocystis Relative Abundance (RA)                   |
| EntamoebaRA                             | Entamoeba Relative Abundance                           |
| PentatriconomasRA                       | Pentatriconomas Relative Abundance                     |
| PCR.Blastocystis.specific               | Presence (1) or Absence (0) of Blastocystis as investi |
| SubTypes                                | Blastocystis subtype                                   |
| Enterotype (DMM4)                       | Enterotype as defined in Falony et al., Science 2016   |
| Age                                     | Age                                                    |

**Table S2**

|                     |                                |
|---------------------|--------------------------------|
| OTU_PR2             | OTUs affiliated to Eukarya     |
| Sequence            | Sequence                       |
| Len                 | Length                         |
| Kingdom             | Taxon                          |
| Phylum              | Taxon                          |
| Class               | Taxon                          |
| Order               | Taxon                          |
| Family              | Taxon                          |
| Genus               | Taxon                          |
| Species             | Taxon                          |
| Blast_best_match    | Accession Number of best match |
| Max score           | Maximum Score                  |
| Total score         | Total Score                    |
| Query cover         | Sequence coverage              |
| E value             | Expected value                 |
| Ident               | Identity                       |
| name                | Description of best match      |
| Subtype assignation | Subtype                        |

**Table S11**

|                     |                                  |
|---------------------|----------------------------------|
| CAP Variable        | Type of variable                 |
| stepRDA             | stepRDA                          |
| Cumulative R2       | Cumulative R2                    |
| group               | Type of variable                 |
| CAP r2              | CAP r2                           |
| FDR                 | q-value (Benjamini Hochberg FDR) |
| exclusion from plot | exclusion from Figure 4          |

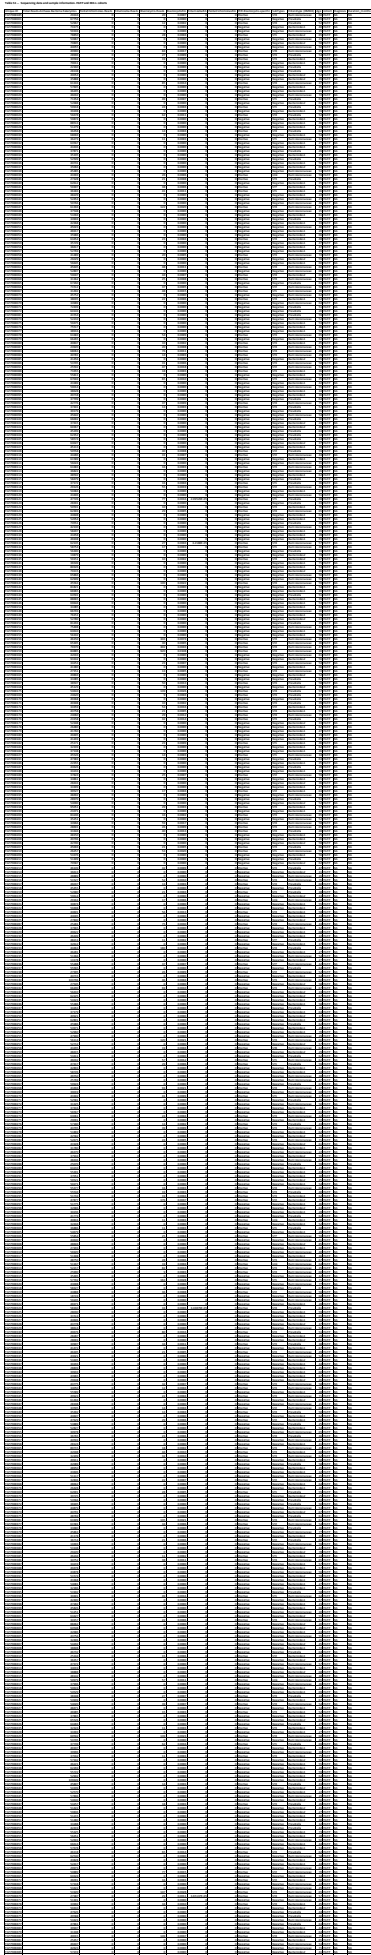

This image shows a vertical sheet of graph paper. The grid consists of 20 columns and 100 rows of small squares. The lines are thin and black, forming a consistent pattern across the entire page.



Table S2 – Taxonomic annotation of eukaryotic OTUs using LotuS and BLAST

| OTU      | Sequnce               | Len | Kingdom   | Phylum       | Class      | Order       | Family       | Genus        | Species      | Blast best # | Max score | Total score | Query cover | E value   | Ident | name                                                                                              | Subtype assignment |
|----------|-----------------------|-----|-----------|--------------|------------|-------------|--------------|--------------|--------------|--------------|-----------|-------------|-------------|-----------|-------|---------------------------------------------------------------------------------------------------|--------------------|
| OTU 306  | TTCCAGCTCGAATAGGTTATA | 205 | Eukaryota | Stramenopila | Opalinata  | X           | Blastocystis | Blastocystis | Blastocystis | 42.242081.1  | 372       | 372         | 100%        | 2.00E-99  | 100%  | Blastocystis sp. subtype 4 strain KK126 small subunit ribosomal RNA gene, partial sequence        | ST4                |
| OTU 533  | TTCCAGCTCGAATAGGTTATA | 413 | Eukaryota | Stramenopila | Opalinata  | X           | Blastocystis | Blastocystis | Blastocystis | 42.242073.1  | 771       | 771         | 100%        | 0         | 100%  | Blastocystis sp. subtype 3 strain KK126 small subunit ribosomal RNA gene, partial sequence        | ST3                |
| OTU 702  | TTCCAGCTCGAATAGGTTATA | 413 | Eukaryota | Stramenopila | Opalinata  | X           | Blastocystis | Blastocystis | Blastocystis | 42.241954.1  | 763       | 763         | 100%        | 0         | 100%  | Blastocystis sp. subtype 1 strain KK079 small subunit ribosomal RNA gene, partial sequence        | ST1                |
| OTU 867  | TTCCAGCTCGAATAGGTTATA | 412 | Eukaryota | Stramenopila | Opalinata  | X           | Blastocystis | Blastocystis | Blastocystis | 42.242060.1  | 761       | 761         | 100%        | 0         | 100%  | Blastocystis sp. subtype 2 strain KK161 small subunit ribosomal RNA gene, partial sequence        | ST2                |
| OTU 1083 | TTCCAGCTCGAATAGGTTATA | 412 | Eukaryota | Stramenopila | Opalinata  | X           | Blastocystis | Blastocystis | Blastocystis | 42.242062.1  | 761       | 761         | 100%        | 0         | 100%  | Blastocystis sp. subtype 2 strain KK046 small subunit ribosomal RNA gene, partial sequence        | ST2                |
| OTU 1644 | TTCCAGCTCGAATAGGTTATA | 205 | Eukaryota | Stramenopila | Opalinata  | X           | Blastocystis | Blastocystis | Blastocystis | 42.242033.1  | 363       | 363         | 100%        | 1.00E-96  | 99%   | Blastocystis sp. subtype 2 strain KK119 small subunit ribosomal RNA gene, partial sequence        | ST2                |
| OTU 1688 | TTCCAGCTCGAATAGGTTATA | 205 | Eukaryota | Stramenopila | Opalinata  | X           | Blastocystis | Blastocystis | Blastocystis | 42.241720.1  | 359       | 359         | 100%        | 2.00E-95  | 99%   | Blastocystis sp. subtype 1 strain BK118, 18S small subunit ribosomal RNA gene, partial sequence   | ST1                |
| OTU 1773 | TTCCAGCTCGAATAGGTTATA | 226 | Eukaryota | Stramenopila | Opalinata  | X           | Blastocystis | Blastocystis | Blastocystis | 42.242040.1  | 360       | 360         | 100%        | 1.00E-97  | 97%   | Blastocystis sp. clone 2 (Opalimon) Opalimon (Opalimon) 18S ribosomal RNA gene, partial sequence  | Unk                |
| OTU 1809 | TTCCAGCTCGAATAGGTTATA | 421 | Eukaryota | Stramenopila | Opalinata  | X           | Blastocystis | Blastocystis | Blastocystis | 42.241715.1  | 758       | 758         | 100%        | 0         | 99%   | Blastocystis 177 strain 8, clone v19, 178S ribosomal RNA gene, partial sequence                   | ST7                |
| OTU 1831 | TTCCAGCTCGAATAGGTTATA | 415 | Eukaryota | Stramenopila | Opalinata  | X           | Blastocystis | Blastocystis | Blastocystis | 42.242485.1  | 756       | 756         | 100%        | 0         | 99%   | Blastocystis sp. subtype 3 strain KK148, 18S ribosomal RNA gene, complete sequence                | ST8                |
| OTU 2093 | TTCCAGCTCGAATAGGTTATA | 411 | Eukaryota | Stramenopila | Opalinata  | X           | Blastocystis | Blastocystis | Blastocystis | 42.242024.1  | 754       | 754         | 100%        | 0         | 99%   | Blastocystis sp. subtype 3 strain KK126 small subunit ribosomal RNA gene, partial sequence        | ST3                |
| OTU 2380 | TTCCAGCTCGAATAGGTTATA | 426 | Eukaryota | Stramenopila | Opalinata  | X           | Blastocystis | Blastocystis | Blastocystis | 42.242024.1  | 760       | 760         | 100%        | 0         | 95%   | Blastocystis sp. subtype 3 strain KK126 small subunit ribosomal RNA gene, partial sequence        | Unk                |
| OTU 4258 | TTCCAGCTCGAATAGGTTATA | 426 | Eukaryota | Stramenopila | Opalinata  | X           | Blastocystis | Blastocystis | Blastocystis | 42.242024.1  | 660       | 660         | 100%        | 0         | 95%   | Blastocystis sp. subtype 3 strain KK126 small subunit ribosomal RNA gene, partial sequence        | Unk                |
| OTU 4846 | TTCCAGCTCGAATAGGTTATA | 412 | Eukaryota | Stramenopila | Opalinata  | X           | Blastocystis | Blastocystis | Blastocystis | 42.242000.1  | 739       | 739         | 100%        | 0         | 99%   | Blastocystis sp. subtype 2 strain KK300 small subunit ribosomal RNA gene, partial sequence        | ST2                |
| OTU 4950 | TTCCAGCTCGAATAGGTTATA | 220 | Eukaryota | Amoebozoa    | Archamoeba | Archamoeba  | Entamoeba    | Entamoeba    | Entamoeba    | 42.242424.1  | 401       | 401         | 100%        | 3.00E-108 | 95%   | Entamoeba coli strain 18S rRNA gene, full-length                                                  | Entamoeba          |
| OTU 2855 | TTCCAGCTCGGAGTTTGT    | 315 | Eukaryota | Excavata     | Parabasala | Trichomonas | Trichomonas  | Pentasticho  | Pentasticho  | 42.242424.1  | 579       | 579         | 100%        | 1.00E-161 | 100%  | Pentastichomonas hominis 18S ribosomal RNA gene, partial sequence (internal transcribed spacer 1) | Pentastichomonas   |















Table S4 - AGP micro-eukaryotic data (Samples positives for Blastocystis 445).

| ID                | Entamoeba | Acanthamoeba | Naegleria | Trichomonas | Dientamoeba | Allovalhampflia | Trichomonas | Vahkampflia | Haemomonchus | ST1 | ST2  | ST3 | ST4 | ST6 | ST7 | ST8 | ST9 | STUNK | Total | Number of no Blastocystis reads | Blastocystis reads | multiple single-cell Eukaryotes | multiple Blastocystis | SubType      |
|-------------------|-----------|--------------|-----------|-------------|-------------|-----------------|-------------|-------------|--------------|-----|------|-----|-----|-----|-----|-----|-----|-------|-------|---------------------------------|--------------------|---------------------------------|-----------------------|--------------|
| AG_000031524.6983 | 0         | 0            | 0         | 0           | 0           | 0               | 0           | 0           | 0            | 0   | 1    | 0   | 0   | 0   | 0   | 0   | 0   | 0     | 1     | 0                               | 0                  | 0                               | 0                     | ST1          |
| AG_000031567.6642 | 0         | 0            | 0         | 0           | 0           | 0               | 0           | 0           | 0            | 0   | 3    | 0   | 0   | 0   | 0   | 0   | 0   | 0     | 3     | 0                               | 0                  | 0                               | 0                     | ST2          |
| AG_000031799.8967 | 0         | 0            | 0         | 0           | 0           | 0               | 0           | 0           | 0            | 0   | 1    | 0   | 0   | 0   | 0   | 0   | 0   | 0     | 1     | 0                               | 0                  | 0                               | 0                     | ST2          |
| AG_000031792.7036 | 0         | 0            | 0         | 0           | 0           | 0               | 0           | 0           | 0            | 0   | 11   | 0   | 0   | 0   | 0   | 0   | 0   | 0     | 11    | 0                               | 0                  | 0                               | 0                     | ST2          |
| AG_000032795.7037 | 0         | 0            | 0         | 0           | 0           | 0               | 0           | 0           | 0            | 0   | 2    | 0   | 0   | 0   | 0   | 0   | 0   | 0     | 2     | 0                               | 0                  | 0                               | 0                     | ST2          |
| AG_000032814.7038 | 0         | 0            | 0         | 0           | 0           | 0               | 0           | 0           | 0            | 0   | 3    | 0   | 0   | 0   | 0   | 0   | 0   | 0     | 3     | 0                               | 0                  | 0                               | 0                     | ST2          |
| AG_000032887.7046 | 0         | 0            | 0         | 0           | 0           | 0               | 0           | 0           | 0            | 0   | 4    | 0   | 0   | 0   | 0   | 0   | 0   | 0     | 4     | 0                               | 0                  | 0                               | 0                     | ST2          |
| AG_000032888.7047 | 0         | 0            | 0         | 0           | 0           | 0               | 0           | 0           | 0            | 0   | 12   | 0   | 0   | 0   | 0   | 0   | 0   | 0     | 12    | 0                               | 0                  | 0                               | 0                     | ST2          |
| AG_000032994.6668 | 0         | 0            | 0         | 0           | 0           | 0               | 0           | 0           | 0            | 0   | 8    | 0   | 0   | 0   | 0   | 0   | 0   | 0     | 8     | 0                               | 0                  | 0                               | 0                     | ST2          |
| AG_000032958.9014 | 0         | 0            | 0         | 0           | 0           | 0               | 0           | 0           | 0            | 0   | 5    | 0   | 0   | 0   | 0   | 0   | 0   | 0     | 5     | 0                               | 0                  | 0                               | 0                     | ST2          |
| AG_000032968.9017 | 0         | 0            | 0         | 0           | 0           | 0               | 0           | 0           | 0            | 0   | 31   | 0   | 0   | 0   | 0   | 0   | 0   | 0     | 31    | 0                               | 0                  | 0                               | 0                     | ST2          |
| AG_000033138.8599 | 0         | 0            | 0         | 0           | 0           | 0               | 0           | 0           | 0            | 0   | 1    | 0   | 0   | 0   | 0   | 0   | 0   | 0     | 1     | 0                               | 0                  | 0                               | 0                     | ST2          |
| AG_000033438.9050 | 0         | 0            | 0         | 0           | 0           | 0               | 0           | 0           | 0            | 0   | 2    | 0   | 0   | 0   | 0   | 0   | 0   | 0     | 2     | 0                               | 0                  | 0                               | 0                     | ST2          |
| AG_000033439.9051 | 0         | 0            | 0         | 0           | 0           | 0               | 0           | 0           | 0            | 0   | 11   | 0   | 0   | 0   | 0   | 0   | 0   | 0     | 11    | 0                               | 0                  | 0                               | 0                     | ST2          |
| AG_000033440.9052 | 0         | 0            | 0         | 0           | 0           | 0               | 0           | 0           | 0            | 0   | 2    | 0   | 0   | 0   | 0   | 0   | 0   | 0     | 2     | 0                               | 0                  | 0                               | 0                     | ST2          |
| AG_000033441.9053 | 0         | 0            | 0         | 0           | 0           | 0               | 0           | 0           | 0            | 0   | 1    | 0   | 0   | 0   | 0   | 0   | 0   | 0     | 1     | 0                               | 0                  | 0                               | 0                     | ST2          |
| AG_000033473.8597 | 0         | 0            | 0         | 0           | 0           | 0               | 0           | 0           | 0            | 0   | 20   | 0   | 0   | 0   | 0   | 0   | 0   | 0     | 20    | 0                               | 0                  | 0                               | 0                     | ST2          |
| AG_000034125.7563 | 0         | 0            | 0         | 0           | 0           | 0               | 0           | 0           | 0            | 0   | 38   | 0   | 0   | 0   | 0   | 0   | 0   | 0     | 38    | 0                               | 0                  | 0                               | 0                     | ST2          |
| AG_000035420.7137 | 0         | 0            | 0         | 0           | 0           | 0               | 0           | 0           | 0            | 0   | 1    | 0   | 0   | 0   | 0   | 0   | 0   | 0     | 1     | 0                               | 0                  | 0                               | 0                     | ST2          |
| AG_000037982.9079 | 0         | 0            | 0         | 0           | 0           | 0               | 0           | 0           | 0            | 0   | 15   | 0   | 0   | 0   | 0   | 0   | 0   | 0     | 15    | 0                               | 0                  | 0                               | 0                     | ST2          |
| AG_000038061.8662 | 0         | 0            | 0         | 0           | 0           | 0               | 0           | 0           | 0            | 0   | 8    | 0   | 0   | 0   | 0   | 0   | 0   | 0     | 8     | 0                               | 0                  | 0                               | 0                     | ST2          |
| AG_000038078.8096 | 0         | 0            | 0         | 0           | 0           | 0               | 0           | 0           | 0            | 0   | 2    | 0   | 0   | 0   | 0   | 0   | 0   | 0     | 2     | 0                               | 0                  | 0                               | 0                     | ST2          |
| AG_000038187.9118 | 0         | 0            | 0         | 0           | 0           | 0               | 0           | 0           | 0            | 0   | 10   | 0   | 0   | 0   | 0   | 0   | 0   | 0     | 10    | 0                               | 0                  | 0                               | 0                     | ST2          |
| AG_000038189.9119 | 0         | 0            | 0         | 0           | 0           | 0               | 0           | 0           | 0            | 0   | 5    | 0   | 0   | 0   | 0   | 0   | 0   | 0     | 5     | 0                               | 0                  | 0                               | 0                     | ST2          |
| AG_000038360.9138 | 0         | 0            | 0         | 0           | 0           | 0               | 0           | 0           | 0            | 0   | 4    | 0   | 0   | 0   | 0   | 0   | 0   | 0     | 4     | 0                               | 0                  | 0                               | 0                     | ST2          |
| AG_000041256.8411 | 0         | 0            | 0         | 0           | 0           | 0               | 0           | 0           | 0            | 0   | 10   | 0   | 0   | 0   | 0   | 0   | 0   | 0     | 10    | 0                               | 0                  | 0                               | 0                     | ST2          |
| AG_000041976.8461 | 0         | 0            | 0         | 0           | 0           | 0               | 0           | 0           | 0            | 0   | 1    | 0   | 0   | 0   | 0   | 0   | 0   | 0     | 1     | 0                               | 0                  | 0                               | 0                     | ST2          |
| AG_000038098.7619 | 0         | 0            | 0         | 0           | 0           | 0               | 0           | 0           | 0            | 0   | 10   | 0   | 3   | 0   | 0   | 0   | 0   | 0     | 13    | 0                               | 0                  | 13                              | yes                   | ST1ST3       |
| AG_000041343.7242 | 0         | 0            | 0         | 0           | 0           | 0               | 0           | 0           | 0            | 0   | 3027 | 0   | 0   | 0   | 0   | 0   | 0   | 0     | 3027  | 0                               | 0                  | 3027                            | yes                   | ST1Entamoeba |
| AG_000001099.25   | 0         | 0            | 0         | 0           | 0           | 0               | 0           | 0           | 0            | 0   | 4    | 0   | 0   | 0   | 0   | 0   | 0   | 0     | 4     | 0                               | 0                  | 0                               | 0                     | ST1          |
| AG_000002073.509  | 0         | 0            | 0         | 0           | 0           | 0               | 0           | 0           | 0            | 0   | 3    | 0   | 0   | 0   | 0   | 0   | 0   | 0     | 3     | 0                               | 0                  | 0                               | 0                     | ST1          |
| AG_000001670.908  | 0         | 0            | 0         | 0           | 0           | 0               | 0           | 0           | 0            | 0   | 3    | 0   | 0   | 0   | 0   | 0   | 0   | 0     | 3     | 0                               | 0                  | 0                               | 0                     | ST1          |
| AG_000002928.4685 | 0         | 0            | 0         | 0           | 0           | 0               | 0           | 0           | 0            | 0   | 44   | 0   | 0   | 0   | 0   | 0   | 0   | 0     | 44    | 0                               | 0                  | 0                               | 0                     | ST1          |
| AG_000006635.1063 | 0         | 0            | 0         | 0           | 0           | 0               | 0           | 0           | 0            | 0   | 1    | 0   | 0   | 0   | 0   | 0   | 0   | 0     | 1     | 0                               | 0                  | 0                               | 0                     | ST1          |
| AG_000007643.1460 | 0         | 0            | 0         | 0           | 0           | 0               | 0           | 0           | 0            | 0   | 6    | 0   | 0   | 0   | 0   | 0   | 0   | 0     | 6     | 0                               | 0                  | 0                               | 0                     | ST1          |
| AG_000007173.1465 | 0         | 0            | 0         | 0           | 0           | 0               | 0           | 0           | 0            | 0   | 4    | 0   | 0   | 0   | 0   | 0   | 0   | 0     | 4     | 0                               | 0                  | 0                               | 0                     | ST1          |
| AG_000009101.1506 | 0         | 0            | 0         | 0           | 0           | 0               | 0           | 0           | 0            | 0   | 1    | 0   | 0   | 0   | 0   | 0   | 0   | 0     | 1     | 0                               | 0                  | 0                               | 0                     | ST1          |
| AG_000009218.1152 | 0         | 0            | 0         | 0           | 0           | 0               | 0           | 0           | 0            | 0   | 7    | 0   | 0   | 0   | 0   | 0   | 0   | 0     | 7     | 0                               | 0                  | 0                               | 0                     | ST1          |
| AG_000007771.1792 | 0         | 0            | 0         | 0           | 0           | 0               | 0           | 0           | 0            | 0   | 4    | 0   | 0   | 0   | 0   | 0   | 0   | 0     | 4     | 0                               | 0                  | 0                               | 0                     | ST1          |
| AG_000011350.1956 | 0         | 0            | 0         | 0           | 0           | 0               | 0           | 0           | 0            | 0   | 1    | 0   | 0   | 0   | 0   | 0   | 0   | 0     | 1     | 0                               | 0                  | 0                               | 0                     | ST1          |
| AG_000011341.1965 | 0         | 0            | 0         | 0           | 0           | 0               | 0           | 0           | 0            | 0   | 2    | 0   | 0   | 0   | 0   | 0   | 0   | 0     | 2     | 0                               | 0                  | 0                               | 0                     | ST1          |
| AG_000011092.1992 | 0         | 0            | 0         | 0           | 0           | 0               | 0           | 0           | 0            | 0   | 12   | 0   | 0   | 0   | 0   | 0   | 0   | 0     | 12    | 0                               | 0                  | 0                               | 0                     | ST1          |
| AG_000012486.3424 | 0         | 0            | 0         | 0           | 0           | 0               | 0           | 0           | 0            | 0   | 102  | 0   | 0   | 0   | 0   | 0   | 0   | 0     | 102   | 0                               | 0                  | 0                               | 0                     | ST1          |
| AG_000012334.5223 | 0         | 0            | 0         | 0           | 0           | 0               | 0           | 0           | 0            | 0   | 5    | 0   | 0   | 0   | 0   | 0   | 0   | 0     | 5     | 0                               | 0                  | 0                               | 0                     | ST1          |
| AG_000013255.7271 | 0         | 0            | 0         | 0           | 0           | 0               | 0           | 0           | 0            | 0   | 7    | 0   | 0   | 0   | 0   | 0   | 0   | 0     | 7     | 0                               | 0                  | 0                               | 0                     | ST1          |
| AG_000013440.2563 | 0         | 0            | 0         | 0           | 0           | 0               | 0           | 0           | 0            | 0   | 6    | 0   | 0   | 0   | 0   | 0   | 0   | 0     | 6     | 0                               | 0                  | 0                               | 0                     | ST1          |
| AG_000014111.2684 | 0         | 0            | 0         | 0           | 0           | 0               | 0           | 0           | 0            | 0   | 6    | 0   | 0   | 0   | 0   | 0   | 0   | 0     | 6     | 0                               | 0                  | 0                               | 0                     | ST1          |
| AG_000014132.3441 | 0         | 0            | 0         | 0           | 0           | 0               | 0           | 0           | 0            | 0   | 1    | 0   | 0   | 0   | 0   | 0   | 0   | 0     | 1     | 0                               | 0                  | 0                               | 0                     | ST1          |
| AG_000014971.2064 | 0         | 0            | 0         | 0           | 0           | 0               | 0           | 0           | 0            | 0   | 1    | 0   | 0   | 0   | 0   | 0   | 0   | 0     | 1     | 0                               | 0                  | 0                               | 0                     | ST1          |
| AG_000015329.2951 | 0         | 0            | 0         | 0           | 0           | 0               | 0           | 0           | 0            | 0   | 51   | 0   | 0   | 0   | 0   | 0   | 0   | 0     | 51    | 0                               | 0                  | 0                               | 0                     | ST1          |
| AG_000016333.3498 | 0         | 0            | 0         | 0           | 0           | 0               | 0           | 0           | 0            | 0   | 1    | 0   | 0   | 0   | 0   | 0   | 0   | 0     | 1     | 0                               | 0                  | 0                               | 0                     | ST1          |
| AG_000017490.6186 | 0         | 0            | 0         | 0           | 0           | 0               | 0           | 0           | 0            | 0   | 73   | 0   | 0   | 0   | 0   | 0   | 0   | 0     | 73    | 0                               | 0                  | 0                               | 0                     | ST1          |
| AG_000002937.7281 | 0         | 0            | 0         | 0           | 0           | 0               | 0           | 0           | 0            | 0   | 11   | 0   | 0   | 0   | 0   | 0   | 0   | 0     | 11    | 0                               | 0                  | 0                               | 0                     | ST1          |
| AG_000021945.4528 | 0         | 0            | 0         | 0           | 0           | 0               | 0           | 0           | 0            | 0   | 1    | 0   | 0   | 0   | 0   | 0   | 0   | 0     | 1     | 0                               | 0                  | 0                               | 0                     | ST1          |
| AG_000025252.7319 | 0         | 0            | 0         | 0           | 0           | 0               | 0           | 0           | 0            | 0   | 88   | 0   | 0   | 0   | 0   | 0   | 0   | 0     | 88    | 0                               | 0                  | 0                               | 0                     | ST1          |
| AG_000002027.6195 | 0         | 0            | 0         | 0           | 0           | 0               | 0           | 0           | 0            | 0   | 1    | 0   | 0   | 0   | 0   | 0   | 0   | 0     | 1     | 0                               | 0                  | 0                               | 0                     | ST1          |
| AG_000026426.5772 | 0         | 0            | 0         | 0           | 0           | 0               | 0           | 0           | 0            | 0   | 144  | 0   | 0   | 0   | 0   | 0   | 0   | 0     | 144   | 0                               | 0                  | 0                               | 0                     | ST1          |
| AG_000024688.6816 | 0         | 0            | 0         | 0           | 0           | 0               | 0           | 0           | 0            | 0   | 144  | 0   | 0   | 0   | 0   | 0   | 0   | 0     | 144   | 0                               | 0                  | 0                               | 0                     | ST1          |
| AG_000027245.5804 | 0         | 0            | 0         | 0           | 0           | 0               | 0           | 0           | 0            | 0   | 38   | 0   | 0   | 0   | 0   | 0   | 0   | 0     | 38    | 0                               | 0                  | 0                               | 0                     | ST1          |
| AG_000027318.5817 | 0         | 0            | 0         | 0           | 0           | 0               | 0           | 0           | 0            | 0   | 5    | 0   | 0   | 0   | 0   | 0   | 0   | 0     | 5     | 0                               | 0                  | 0                               | 0                     | ST1          |
| AG_000027898.6235 | 0         | 0            | 0         | 0           | 0           | 0               | 0           | 0           | 0            | 0   | 1    | 0   | 0   | 0   | 0   | 0   | 0   | 0     | 1     | 0                               | 0                  | 0                               | 0                     | ST1          |
| AG_000028105.7391 | 0         | 0            | 0         | 0           | 0           | 0               | 0           | 0           | 0            | 0   | 1    | 0   | 0   | 0   | 0   | 0   | 0   | 0     | 1     | 0                               | 0                  | 0                               | 0                     | ST1          |
| AG_000028154.5901 | 0         | 0            | 0         | 0           | 0           | 0               | 0           | 0           | 0            | 0   | 9    | 0   | 0   | 0   | 0   | 0   | 0   | 0     | 9     | 0                               | 0                  | 0                               | 0                     | ST1          |
| AG_000028445.5926 | 0         | 0            | 0         | 0           | 0           | 0               | 0           | 0           | 0            | 0   | 19   | 0   | 0   | 0   | 0   | 0   | 0   | 0     | 19    | 0                               | 0                  | 0                               | 0                     | ST1          |
| AG_000028711.5953 | 0         | 0            | 0         | 0           | 0           | 0               | 0           | 0           | 0            | 0   | 2    | 0   | 0   | 0   | 0   | 0   | 0   | 0     | 2     | 0                               | 0                  | 0                               | 0                     | ST1          |
| AG_000029571.8943 | 0         | 0            | 0         | 0           | 0           | 0               | 0           | 0           | 0            | 0   | 1    | 0   | 0   | 0   | 0   | 0   | 0   | 0     | 1     | 0                               | 0                  | 0                               | 0                     | ST1          |
| AG_000029430.6040 | 0         | 0            | 0         | 0           | 0           | 0               | 0           | 0           | 0            | 0   | 2    | 0   | 0   | 0   | 0   | 0   | 0   | 0     | 2     | 0                               | 0                  | 0                               | 0                     | ST1          |
| AG_000029483.6364 | 0         | 0            | 0         | 0           | 0           | 0               | 0           | 0           | 0            | 0   | 2    | 0   | 0   | 0   | 0   | 0   | 0   | 0     | 2     | 0                               | 0                  | 0                               | 0                     | ST1          |
| AG_000029596.6369 | 0         | 0            | 0         | 0           | 0           | 0               | 0           | 0           | 0            | 0   | 4    | 0   | 0   | 0   | 0   | 0   | 0   | 0     | 4     | 0                               | 0                  | 0                               | 0                     | ST1          |
| AG_000030124.6446 | 0         | 0            | 0         | 0           | 0           | 0               | 0           | 0           | 0            | 0   | 47   | 0   | 0   | 0   | 0   | 0   | 0   | 0     | 47    | 0                               | 0                  | 0                               | 0                     | ST1          |
| AG_0000           |           |              |           |             |             |                 |             |             |              |     |      |     |     |     |     |     |     |       |       |                                 |                    |                                 |                       |              |

Table S5 -- UK Twin micro-eukaryotic data (Samples positives for Blastocystis 138)

| Twins UK micro-eukaryotic data | Dientamoeba | Entamoeba | ST1 | ST2 | ST3 | ST4 | ST7 | Total of micro-eukaryotes reads | No Blastocystis reads | Blastocystis reads | Multiple single-cell Eu | Multiple Blastocystis subtypes | SubType        |
|--------------------------------|-------------|-----------|-----|-----|-----|-----|-----|---------------------------------|-----------------------|--------------------|-------------------------|--------------------------------|----------------|
| ERR561184                      | 0           | 0         | 0   | 0   | 0   | 94  | 0   | 94                              | 0                     | 94                 | no                      |                                | ST4            |
| ERR561054                      | 0           | 3         | 0   | 0   | 65  | 0   | 68  | 68                              | 3                     | 65                 | yes                     | no                             | ST4Entamoeba   |
| ERR561159                      | 0           | 0         | 0   | 0   | 62  | 0   | 62  | 0                               | 0                     | 62                 | no                      | no                             | ST4            |
| ERR560996                      | 0           | 0         | 0   | 0   | 52  | 0   | 52  | 0                               | 0                     | 52                 | no                      | no                             | ST4            |
| ERR561305                      | 2           | 0         | 0   | 0   | 46  | 0   | 48  | 48                              | 2                     | 46                 | yes                     | no                             | ST4Dientamoeba |
| ERR561547                      | 0           | 0         | 0   | 0   | 45  | 0   | 45  | 0                               | 0                     | 45                 | no                      | no                             | ST4            |
| ERR561509                      | 0           | 0         | 0   | 0   | 42  | 0   | 42  | 0                               | 0                     | 42                 | no                      | no                             | ST4            |
| ERR560767                      | 0           | 0         | 0   | 0   | 35  | 0   | 35  | 0                               | 0                     | 35                 | no                      | no                             | ST4            |
| ERR561391                      | 0           | 0         | 0   | 0   | 32  | 0   | 32  | 0                               | 0                     | 32                 | no                      | no                             | ST1            |
| ERR561605                      | 0           | 0         | 0   | 0   | 30  | 0   | 30  | 0                               | 0                     | 30                 | no                      | no                             | ST4            |
| ERR560994                      | 0           | 0         | 0   | 0   | 29  | 0   | 29  | 0                               | 0                     | 29                 | no                      | no                             | ST3            |
| ERR560671                      | 0           | 0         | 0   | 0   | 27  | 0   | 27  | 0                               | 0                     | 27                 | no                      | no                             | ST4            |
| ERR561617                      | 0           | 0         | 26  | 0   | 0   | 0   | 26  | 0                               | 0                     | 26                 | no                      | no                             | ST1            |
| ERR561638                      | 0           | 0         | 0   | 0   | 24  | 0   | 24  | 0                               | 0                     | 24                 | no                      | no                             | ST4            |
| ERR561649                      | 0           | 0         | 0   | 0   | 24  | 0   | 24  | 0                               | 0                     | 24                 | no                      | no                             | ST4            |
| ERR560636                      | 0           | 0         | 0   | 0   | 20  | 0   | 20  | 0                               | 0                     | 20                 | no                      | no                             | ST4            |
| ERR561561                      | 0           | 0         | 0   | 0   | 20  | 0   | 20  | 0                               | 0                     | 20                 | no                      | no                             | ST4            |
| ERR561404                      | 0           | 0         | 0   | 19  | 0   | 0   | 19  | 0                               | 0                     | 19                 | no                      | no                             | ST1            |
| ERR560941                      | 0           | 0         | 0   | 19  | 0   | 0   | 19  | 0                               | 0                     | 19                 | no                      | no                             | ST3            |
| ERR561617                      | 0           | 0         | 0   | 19  | 0   | 0   | 19  | 0                               | 0                     | 19                 | no                      | no                             | ST3            |
| ERR561618                      | 0           | 0         | 0   | 0   | 18  | 0   | 18  | 0                               | 0                     | 18                 | no                      | no                             | ST4            |
| ERR560881                      | 1           | 0         | 0   | 0   | 17  | 0   | 18  | 1                               | 17                    | 17                 | yes                     | no                             | ST4Dientamoeba |
| ERR560776                      | 0           | 0         | 0   | 16  | 0   | 0   | 16  | 0                               | 0                     | 16                 | no                      | no                             | ST1            |
| ERR560713                      | 0           | 0         | 13  | 0   | 0   | 0   | 13  | 0                               | 0                     | 13                 | no                      | no                             | ST1            |
| ERR561283                      | 0           | 0         | 15  | 0   | 0   | 0   | 15  | 0                               | 0                     | 15                 | no                      | no                             | ST1            |
| ERR560588                      | 0           | 0         | 14  | 0   | 0   | 0   | 14  | 0                               | 0                     | 14                 | no                      | no                             | ST1            |
| ERR561436                      | 0           | 0         | 0   | 14  | 0   | 0   | 14  | 0                               | 0                     | 14                 | no                      | no                             | ST3            |
| ERR560788                      | 0           | 0         | 0   | 13  | 0   | 0   | 13  | 0                               | 0                     | 13                 | no                      | no                             | ST4            |
| ERR561055                      | 0           | 0         | 0   | 0   | 13  | 0   | 13  | 0                               | 0                     | 13                 | no                      | no                             | ST4            |
| ERR561393                      | 0           | 0         | 12  | 0   | 0   | 0   | 12  | 0                               | 0                     | 12                 | no                      | no                             | ST1            |
| ERR561452                      | 0           | 0         | 0   | 12  | 0   | 0   | 12  | 0                               | 0                     | 12                 | no                      | no                             | ST1            |
| ERR561392                      | 0           | 0         | 0   | 12  | 0   | 0   | 12  | 0                               | 0                     | 12                 | no                      | no                             | ST4            |
| ERR561352                      | 0           | 0         | 0   | 0   | 12  | 0   | 12  | 0                               | 0                     | 12                 | no                      | no                             | ST4            |
| ERR560658                      | 0           | 0         | 0   | 0   | 12  | 0   | 12  | 0                               | 0                     | 12                 | no                      | no                             | ST7            |
| ERR560736                      | 0           | 0         | 0   | 11  | 0   | 0   | 11  | 0                               | 0                     | 11                 | no                      | no                             | ST1            |
| ERR561565                      | 0           | 0         | 0   | 11  | 0   | 0   | 11  | 0                               | 0                     | 11                 | no                      | no                             | ST3            |
| ERR560640                      | 0           | 0         | 0   | 0   | 11  | 0   | 11  | 0                               | 0                     | 11                 | no                      | no                             | ST4            |
| ERR561245                      | 0           | 0         | 0   | 0   | 11  | 0   | 11  | 0                               | 0                     | 11                 | no                      | no                             | ST4            |
| ERR561418                      | 0           | 0         | 0   | 0   | 11  | 0   | 11  | 0                               | 0                     | 11                 | no                      | no                             | ST4            |
| ERR561422                      | 0           | 11        | 0   | 0   | 11  | 0   | 11  | 0                               | 0                     | 11                 | no                      | no                             | ST4            |
| ERR561624                      | 0           | 0         | 0   | 0   | 11  | 0   | 11  | 0                               | 0                     | 11                 | no                      | no                             | ST4            |
| ERR561175                      | 0           | 0         | 0   | 0   | 10  | 0   | 10  | 0                               | 0                     | 10                 | no                      | no                             | ST4            |
| ERR561349                      | 0           | 0         | 0   | 9   | 0   | 0   | 9   | 0                               | 0                     | 9                  | no                      | no                             | ST2            |
| ERR561647                      | 0           | 0         | 0   | 9   | 0   | 0   | 9   | 0                               | 0                     | 9                  | no                      | no                             | ST4            |
| ERR561622                      | 0           | 0         | 0   | 0   | 8   | 0   | 8   | 0                               | 0                     | 8                  | no                      | no                             | ST3            |
| ERR561369                      | 0           | 0         | 0   | 0   | 8   | 0   | 8   | 0                               | 0                     | 8                  | no                      | no                             | ST4            |
| ERR561537                      | 0           | 0         | 0   | 0   | 8   | 0   | 8   | 0                               | 0                     | 8                  | no                      | no                             | ST4            |
| ERR561610                      | 0           | 0         | 0   | 0   | 8   | 0   | 8   | 0                               | 0                     | 8                  | no                      | no                             | ST4            |
| ERR561288                      | 0           | 0         | 0   | 7   | 0   | 0   | 7   | 0                               | 0                     | 7                  | no                      | no                             | ST2            |
| ERR561613                      | 0           | 0         | 0   | 7   | 0   | 0   | 7   | 0                               | 0                     | 7                  | no                      | no                             | ST2            |
| ERR560881                      | 0           | 0         | 0   | 7   | 0   | 0   | 7   | 0                               | 0                     | 7                  | no                      | no                             | ST4            |
| ERR560986                      | 0           | 0         | 6   | 0   | 0   | 0   | 6   | 0                               | 0                     | 6                  | no                      | no                             | ST1            |
| ERR561060                      | 0           | 0         | 6   | 0   | 0   | 0   | 6   | 0                               | 0                     | 6                  | no                      | no                             | ST1            |
| ERR561487                      | 0           | 0         | 6   | 0   | 0   | 0   | 6   | 0                               | 0                     | 6                  | no                      | no                             | ST2            |
| ERR561343                      | 0           | 0         | 0   | 6   | 0   | 0   | 6   | 0                               | 0                     | 6                  | no                      | no                             | ST3            |
| ERR560750                      | 0           | 0         | 0   | 6   | 0   | 0   | 6   | 0                               | 0                     | 6                  | no                      | no                             | ST4            |
| ERR560838                      | 0           | 0         | 0   | 6   | 0   | 0   | 6   | 0                               | 0                     | 6                  | no                      | no                             | ST4            |
| ERR561496                      | 0           | 0         | 5   | 0   | 0   | 0   | 5   | 0                               | 0                     | 5                  | no                      | no                             | ST1            |
| ERR560725                      | 0           | 0         | 0   | 5   | 0   | 0   | 5   | 0                               | 0                     | 5                  | no                      | no                             | ST2            |
| ERR561553                      | 0           | 0         | 0   | 5   | 0   | 0   | 5   | 0                               | 0                     | 5                  | no                      | no                             | ST2            |
| ERR561155                      | 0           | 0         | 0   | 5   | 0   | 0   | 5   | 0                               | 0                     | 5                  | no                      | no                             | ST3            |
| ERR561198                      | 0           | 0         | 0   | 5   | 0   | 0   | 5   | 0                               | 0                     | 5                  | no                      | no                             | ST3            |
| ERR561329                      | 0           | 0         | 0   | 5   | 0   | 0   | 5   | 0                               | 0                     | 5                  | no                      | no                             | ST3            |
| ERR560620                      | 0           | 0         | 0   | 0   | 5   | 0   | 5   | 0                               | 0                     | 5                  | no                      | no                             | ST4            |
| ERR560800                      | 0           | 0         | 0   | 0   | 5   | 0   | 5   | 0                               | 0                     | 5                  | no                      | no                             | ST4            |
| ERR561009                      | 0           | 0         | 0   | 0   | 5   | 0   | 5   | 0                               | 0                     | 5                  | no                      | no                             | ST4            |
| ERR561465                      | 0           | 0         | 0   | 0   | 5   | 0   | 5   | 0                               | 0                     | 5                  | no                      | no                             | ST4            |
| ERR561545                      | 0           | 0         | 0   | 0   | 5   | 0   | 5   | 0                               | 0                     | 5                  | no                      | no                             | ST4            |
| ERR560612                      | 0           | 0         | 0   | 4   | 0   | 0   | 4   | 0                               | 0                     | 4                  | no                      | no                             | ST3            |
| ERR560845                      | 0           | 0         | 0   | 4   | 0   | 0   | 4   | 0                               | 0                     | 4                  | no                      | no                             | ST3            |
| ERR561317                      | 0           | 0         | 0   | 4   | 0   | 0   | 4   | 0                               | 0                     | 4                  | no                      | no                             | ST3            |
| ERR561494                      | 0           | 0         | 0   | 4   | 0   | 0   | 4   | 0                               | 0                     | 4                  | no                      | no                             | ST3            |
| ERR560968                      | 0           | 0         | 0   | 0   | 4   | 0   | 4   | 0                               | 0                     | 4                  | no                      | no                             | ST4            |
| ERR561464                      | 0           | 0         | 0   | 0   | 4   | 0   | 4   | 0                               | 0                     | 4                  | no                      | no                             | ST4            |
| ERR561669                      | 0           | 0         | 0   | 0   | 4   | 0   | 4   | 0                               | 0                     | 4                  | no                      | no                             | ST4            |
| ERR561650                      | 1           | 0         | 0   | 0   | 3   | 0   | 4   | 1                               | 3                     | 3                  | yes                     | no                             | ST4Dientamoeba |
| ERR560815                      | 0           | 0         | 3   | 0   | 0   | 0   | 3   | 0                               | 0                     | 3                  | no                      | no                             | ST1            |
| ERR560867                      | 0           | 0         | 3   | 0   | 0   | 0   | 3   | 0                               | 0                     | 3                  | no                      | no                             | ST1            |
| ERR560788                      | 0           | 0         | 0   | 3   | 0   | 0   | 3   | 0                               | 0                     | 3                  | no                      | no                             | ST2            |
| ERR561520                      | 0           | 0         | 0   | 3   | 0   | 0   | 3   | 0                               | 0                     | 3                  | no                      | no                             | ST2            |
| ERR561035                      | 0           | 0         | 0   | 3   | 0   | 0   | 3   | 0                               | 0                     | 3                  | no                      | no                             | ST3            |
| ERR561253                      | 0           | 0         | 0   | 3   | 0   | 0   | 3   | 0                               | 0                     | 3                  | no                      | no                             | ST3            |
| ERR560688                      | 0           | 0         | 0   | 3   | 0   | 0   | 3   | 0                               | 0                     | 3                  | no                      | no                             | ST4            |
| ERR560683                      | 0           | 0         | 0   | 0   | 3   | 0   | 3   | 0                               | 0                     | 3                  | no                      | no                             | ST4            |
| ERR560885                      | 0           | 0         | 0   | 0   | 3   | 0   | 3   | 0                               | 0                     | 3                  | no                      | no                             | ST4            |
| ERR560955                      | 0           | 0         | 0   | 0   | 3   | 0   | 3   | 0                               | 0                     | 3                  | no                      | no                             | ST4            |
| ERR561356                      | 0           | 0         | 0   | 0   | 3   | 0   | 3   | 0                               | 0                     | 3                  | no                      | no                             | ST4            |
| ERR561409                      | 0           | 0         | 0   | 0   | 3   | 0   | 3   | 0                               | 0                     | 3                  | no                      | no                             | ST4            |
| ERR561454                      | 0           | 0         | 0   | 0   | 3   | 0   | 3   | 0                               | 0                     | 3                  | no                      | no                             | ST4            |
| ERR561325                      | 0           | 0         | 0   | 2   | 0   | 0   | 2   | 0                               | 0                     | 2                  | no                      | no                             | ST2            |
| ERR561414                      | 0           | 0         | 0   | 2   | 0   | 0   | 2   | 0                               | 0                     | 2                  | no                      | no                             | ST2            |
| ERR561498                      | 0           | 0         | 0   | 2   | 0   | 0   | 2   | 0                               | 0                     | 2                  | no                      | no                             | ST3            |
| ERR560602                      | 0           | 0         | 0   | 0   | 2   | 0   | 2   | 0                               | 0                     | 2                  | no                      | no                             | ST4            |
| ERR560644                      | 0           | 0         | 0   | 0   | 2   | 0   | 2   | 0                               | 0                     | 2                  | no                      | no                             | ST4            |
| ERR560921                      | 0           | 0         | 0   | 0   | 2   | 0   | 2   | 0                               | 0                     | 2                  | no                      | no                             | ST4            |
| ERR561018                      | 0           | 0         | 0   | 0   | 2   | 0   | 2   | 0                               | 0                     | 2                  | no                      | no                             | ST4            |
| ERR561162                      | 0           | 0         | 0   | 0   | 2   | 0   | 2   | 0                               | 0                     | 2                  | no                      | no                             | ST4            |
| ERR561326                      | 0           | 0         | 0   | 0   | 2   | 0   | 2   | 0                               | 0                     | 2                  | no                      | no                             | ST4            |
| ERR561349                      | 0           | 0         | 0   | 0   | 2   | 0   | 2   | 0                               | 0                     | 2                  | no                      | no                             | ST4            |
| ERR561508                      | 0           | 0         | 0   | 0   | 2   | 0   | 2   | 0                               | 0                     | 2                  | no                      | no                             | ST4            |
| ERR561588                      | 0           | 0         | 0   | 0   | 2   | 0   | 2   | 0                               | 0                     | 2                  | no                      | no                             | ST4            |
| ERR561625                      | 0           | 0         | 0   | 0   | 2   | 0   | 2   | 0                               | 0                     | 2                  | no                      | no                             | ST4            |
| ERR560921                      | 0           | 1         | 0   | 0   | 1   | 0   | 2   | 1                               | 1                     | 1                  | yes                     | no                             | ST4Entamoeba   |
| ERR561246                      | 0           | 0         | 1   | 0   | 0   | 0   | 1   | 0                               | 0                     | 1                  | no                      | no                             | ST1            |
| ERR560675                      | 0           | 0         | 0   | 1   | 0   | 0   | 1   | 0                               | 0                     | 1                  | no                      | no                             | ST2            |
| ERR560728                      | 0           | 0         | 0   | 1   | 0   | 0   | 1   | 0                               | 0                     | 1                  | no                      | no                             | ST2            |
| ERR560854                      | 0           | 0         | 0   | 1   | 0   | 0   | 1   | 0                               | 0                     | 1                  | no                      | no                             | ST2            |
| ERR561093                      | 0           | 0         | 0   | 1   | 0   | 0   | 1   | 0                               | 0                     | 1                  | no                      | no                             | ST2            |
| ERR561376                      | 0           | 0         | 0   | 1   | 0   | 0   | 1   | 0                               | 0                     | 1                  | no                      | no                             | ST2            |
| ERR561465                      | 0           | 0         | 0   | 1   | 0   | 0   | 1   | 0                               | 0                     | 1                  | no                      | no                             | ST2            |
| ERR561484                      | 0           | 0         | 0   | 1   | 0   | 0   | 1   | 0                               | 0                     | 1                  | no                      | no                             | ST2            |
| ERR560813                      | 0           | 0         | 0   | 1   | 0   | 0   | 1   | 0                               | 0                     | 1                  | no                      | no                             | ST3            |
| ERR561033                      | 0           | 0         | 0   | 1   | 0   | 0   | 1   | 0                               | 0                     | 1                  | no                      | no                             | ST3            |
| ERR561092                      | 0           | 0         | 0   | 1   | 0   | 0   | 1   | 0                               | 0                     | 1                  | no                      | no                             | ST3            |
| ERR561285                      | 0           | 0         | 0   | 1   | 0   | 0   | 1   | 0                               | 0                     | 1                  | no                      | no                             | ST3            |
| ERR561362                      | 0           | 0         | 0   | 1   | 0   | 0   | 1   | 0                               | 0                     | 1                  | no                      | no                             | ST3            |
| ERR561602                      | 0           | 0         | 0   | 1   | 0   | 0   | 1   | 0                               | 0                     | 1                  | no                      | no                             | ST3            |
| ERR560575                      | 0           | 0         | 0   | 0   | 1   | 0   | 1   | 0                               | 0                     | 1                  | no                      | no                             | ST4            |
| ERR560617                      | 0           | 0         | 0   | 0   | 1   | 0   | 1   | 0                               | 0                     | 1                  | no                      | no                             | ST4            |
| ERR560670                      | 0           | 0         | 0   | 0   | 1   | 0   | 1   | 0                               | 0                     | 1                  | no                      | no                             | ST4            |
| ERR560743                      | 0           | 0         | 0   | 0   | 1   | 0   | 1   | 0                               | 0                     | 1                  | no                      | no                             | ST4            |
| ERR560843                      | 0           | 0         | 0   | 0   | 1   | 0   | 1   | 0                               | 0                     | 1                  | no                      | no                             | ST4            |
| ERR560851                      | 0           | 0         | 0   | 0   | 1   | 0   | 1   | 0                               | 0                     | 1                  | no                      | no                             | ST4            |
| ERR560886                      | 0           | 0         | 0   | 0   | 1   | 0   | 1   | 0                               | 0                     | 1                  | no                      | no                             | ST4            |
| ERR560920                      | 0           | 0         | 0   | 0   | 1   | 0   | 1   | 0                               | 0                     | 1                  | no                      | no                             |                |

Table S6 -- Blastocystis status (Carriers and non-carriers) and phenotypic microbiome covariates (Wilcoxon test)

| Wilcoxon test                                                     | W       | p-value     | q-values (FDR) |
|-------------------------------------------------------------------|---------|-------------|----------------|
| Age                                                               | 42951   | 0.00032037  | 0.022          |
| HOMA_IR                                                           | 15697.5 | 0.004345176 | 0.143          |
| sugary_soda_consumption_frequency_last_week                       | 31526   | 0.006221943 | 0.143          |
| ANTIBIOTICS_J01CA04                                               | 33082   | 0.008481428 | 0.146          |
| GFR_CDK.EPI                                                       | 31488   | 0.014717572 | 0.203          |
| BetaGlobulines.g.L                                                | 31750   | 0.021310298 | 0.239          |
| chocolate_type                                                    | 39847.5 | 0.027570115 | 0.239          |
| Ureum.mg.dL                                                       | 40300.5 | 0.027698895 | 0.239          |
| Alfa2Globulines.g.L                                               | 32390.5 | 0.049375497 | 0.364          |
| fruits_consumption_frequency_last_week                            | 39619   | 0.058016837 | 0.364          |
| RBC.milj.mm3                                                      | 32470.5 | 0.054613054 | 0.364          |
| coffee_last_consumption_before_sampling                           | 32898.5 | 0.073870642 | 0.368          |
| GPT.U.L                                                           | 32738   | 0.074617914 | 0.368          |
| meat_average_consumption_last_week                                | 32885   | 0.071346977 | 0.368          |
| Gastroenteritis_other_treatment                                   | 35001   | 0.083026001 | 0.382          |
| age_at_first_work                                                 | 38818.5 | 0.09099964  | 0.384          |
| soy_products_average_consumption_last_week                        | 38476.5 | 0.100250418 | 0.384          |
| Triglyceriden.mg.dL                                               | 32955   | 0.095551938 | 0.384          |
| MEDICATION_A06AD15_65                                             | 35616   | 0.124164655 | 0.428          |
| MEDICATION_L04AX01                                                | 35616   | 0.124164655 | 0.428          |
| ANTIBIOTICS_J01CR02                                               | 34779   | 0.133467846 | 0.439          |
| bloating_last_week                                                | 34432.5 | 0.18655845  | 0.483          |
| BMI                                                               | 33693   | 0.201220561 | 0.483          |
| do_you_want_to_do_something_about_your_weight                     | 38324.5 | 0.186892217 | 0.483          |
| FOODSUPPLEMENT_Mg                                                 | 35579   | 0.199584985 | 0.483          |
| how_do_you_find_yourself                                          | 38459   | 0.191580058 | 0.483          |
| MEDICATION_G03AA12                                                | 35784   | 0.210107769 | 0.483          |
| MEDICATION_L04AB                                                  | 35784   | 0.210107769 | 0.483          |
| most_eaten_bread_type                                             | 37774   | 0.158929629 | 0.483          |
| workQuestions.workStyle.option.13                                 | 35300   | 0.204004576 | 0.483          |
| MEDICATION_N06AX16                                                | 36513   | 0.230565324 | 0.513          |
| CK.U.L                                                            | 38267.5 | 0.258077677 | 0.556          |
| alcohol_average_consumption_last_week                             | 34341   | 0.331095038 | 0.598          |
| ANTIBIOTICS_J01XE01                                               | 35626   | 0.303045178 | 0.598          |
| beer_consumption                                                  | 34489.5 | 0.355389648 | 0.598          |
| constipated_last_week                                             | 34608   | 0.321268735 | 0.598          |
| frequency_of_sick_leaves_last_year                                | 34468.5 | 0.354735283 | 0.598          |
| MEDICATION_G03CA04_CC06                                           | 36382   | 0.328444635 | 0.598          |
| PARTICIPANT_Inflammatory_Bowel_Disease_Colitis_ulcerosa           | 35626   | 0.303045178 | 0.598          |
| sleeping_hours_per_day                                            | 37881   | 0.324034248 | 0.598          |
| Urinezuur.mg.dL                                                   | 34335   | 0.347037972 | 0.598          |
| fruits_last_consumption_before_sampling                           | 34573   | 0.37832461  | 0.607          |
| Gamma.GT.U.L                                                      | 34435   | 0.374498341 | 0.607          |
| number_of_work_daysaweek                                          | 34613   | 0.39674129  | 0.622          |
| MEDICATION_G03DA04                                                | 36251   | 0.490281737 | 0.752          |
| MCHC.g.dL                                                         | 37278.5 | 0.525674971 | 0.789          |
| PARTICIPANTS_ALLERGY_food                                         | 35656   | 0.542385031 | 0.796          |
| averageCigarettesConsumptionPerDayLast3Months                     | 35584.5 | 0.556904851 | 0.797          |
| last_week_break_fast_count                                        | 36851.5 | 0.565649504 | 0.797          |
| Hemoglobine.g.dL                                                  | 35081   | 0.584136983 | 0.799          |
| PARTICIPANT_Spastische_darm                                       | 35376   | 0.590398953 | 0.799          |
| average_week_work_hours                                           | 35400   | 0.692249172 | 0.821          |
| doYouInhale                                                       | 35447.5 | 0.689925903 | 0.821          |
| FOODSUPPLEMENT_Q10                                                | 35999   | 0.686199073 | 0.821          |
| HDL.chol..mg.dL                                                   | 36808   | 0.717068516 | 0.821          |
| MEDICATION_A07EC02                                                | 35999   | 0.686199073 | 0.821          |
| MEDICATION_R06AX28                                                | 35999   | 0.686199073 | 0.821          |
| PARTICIPANT_CVS                                                   | 36469   | 0.651248689 | 0.821          |
| Smoker                                                            | 35770   | 0.710429979 | 0.821          |
| spirits_consumption                                               | 35308.5 | 0.634345954 | 0.821          |
| stoole_score                                                      | 35497.5 | 0.726212656 | 0.821          |
| Gender                                                            | 36637   | 0.751769403 | 0.837          |
| previous_relief                                                   | 36515.5 | 0.831166528 | 0.91           |
| MEDICATION_N03AE01                                                | 36046   | 0.844739773 | 0.911          |
| Creatinine.mg.dL                                                  | 35845   | 0.884828606 | 0.925          |
| height                                                            | 36420.5 | 0.874183217 | 0.925          |
| householdCompositionQuestions.petCohabitationLast3Months.option.2 | 36229   | 0.941006704 | 0.969          |
| Heupontrek                                                        | 33138   | 0.967732776 | 0.982          |
| residency_desc_younger_than_5                                     | 36097.5 | 0.989917711 | 0.99           |

**Table S7 -- Blastocystis Subtypes (Non-carriers and different subtypes) and age (Pairwise comparisons using Wilcoxon test)**  
P value adjustment method: fdr

| Pairwise comparisons using Wilcoxon test | Non-carriers | ST01    | ST02    | ST03    |
|------------------------------------------|--------------|---------|---------|---------|
| ST01                                     | 0.72591      | -       | -       | -       |
| ST02                                     | 0.72591      | 0.984   | -       | -       |
| ST03                                     | 0.15295      | 0.69522 | 0.55738 | -       |
| ST04                                     | 0.00071      | 0.23687 | 0.15102 | 0.44908 |

**Table S8 -- Bacterial and archaeal genera with distinct relative abundance distributions (Wilcoxon test)**

|                               | W     | p-value | q-values |
|-------------------------------|-------|---------|----------|
| Akkermansia                   | 30275 | 1.6E-03 | 3.4E-03  |
| Anaerostipes                  | 44538 | 9.3E-06 | 2.7E-05  |
| Bacteroides                   | 45487 | 8.1E-07 | 3.2E-06  |
| Blautia                       | 42300 | 1.1E-03 | 2.5E-03  |
| Butyrivicoccus                | 31098 | 6.5E-04 | 1.6E-03  |
| Butyrivicimonas               | 30339 | 2.2E-03 | 4.4E-03  |
| Cerasicoccus                  | 20888 | 1.3E-25 | 3.9E-24  |
| Clostridium IV                | 20530 | 2.2E-16 | 2.6E-15  |
| Clostridium sensu stricto     | 25968 | 6.3E-08 | 3.4E-07  |
| Clostridium XIVa              | 44882 | 2.0E-06 | 6.9E-06  |
| Clostridium XVIII             | 45080 | 5.8E-07 | 2.5E-06  |
| Coprobacter                   | 25256 | 5.4E-09 | 3.6E-08  |
| Coprococcus                   | 24122 | 2.6E-10 | 2.6E-09  |
| Desulfovibrio                 | 26353 | 1.4E-09 | 1.2E-08  |
| Dorea                         | 41248 | 6.9E-03 | 1.3E-02  |
| Eggerthella                   | 43965 | 2.0E-07 | 1.0E-06  |
| Enterococcus                  | 40194 | 7.5E-03 | 1.3E-02  |
| Flavonifractor                | 45409 | 9.5E-07 | 3.6E-06  |
| Gemmiger                      | 41212 | 7.3E-03 | 1.3E-02  |
| Gordonibacter                 | 40235 | 2.3E-03 | 4.4E-03  |
| Holdemanella                  | 30743 | 1.1E-03 | 2.5E-03  |
| Intestinibacter               | 31238 | 9.1E-03 | 1.5E-02  |
| Intestinimonas                | 28259 | 2.3E-05 | 5.9E-05  |
| Lachnospiracea_incertae_sedis | 24858 | 3.0E-09 | 2.3E-08  |
| Methanobrevibacter            | 20190 | 1.1E-20 | 2.3E-19  |
| Olsenella                     | 31510 | 4.2E-03 | 7.9E-03  |
| Oscillibacter                 | 20049 | 2.5E-17 | 3.8E-16  |
| Paraprevotella                | 28800 | 7.4E-06 | 2.3E-05  |
| Parasutterella                | 31869 | 2.4E-02 | 3.8E-02  |
| Prevotella                    | 26042 | 3.0E-08 | 1.8E-07  |
| Romboutsia                    | 28548 | 6.3E-05 | 1.6E-04  |
| Roseburia                     | 45698 | 4.6E-07 | 2.1E-06  |
| Ruminococcus2                 | 30244 | 1.9E-03 | 4.0E-03  |
| Senegalimassilia              | 28444 | 8.0E-06 | 2.4E-05  |
| Slackia                       | 32278 | 2.2E-02 | 3.5E-02  |
| Streptococcus                 | 44438 | 1.2E-05 | 3.2E-05  |
| Turicibacter                  | 28028 | 2.1E-06 | 6.9E-06  |
| Victivallis                   | 17056 | 1.0E-29 | 6.0E-28  |

Table S9 -- Genera differentially associated to Blastocystis subtypes (Kruskal-Wallis and Wilcoxon tests).

| Kruskal-Wallis                 | Chi2    | p-value  | q-values (FDR) | Wilcoxon (effect size) | ST1_ST2_r       | ST1_ST3_r       | ST1_ST4_r       | ST2_ST3_r       | ST2_ST4_r       | ST3_ST4_r       |
|--------------------------------|---------|----------|----------------|------------------------|-----------------|-----------------|-----------------|-----------------|-----------------|-----------------|
| Anaerotruncus                  | 16.133  | 0.001065 | 0.06391265     | Anaerotruncus          | 0.32            |                 |                 | 0.27            | 0.41            | 0.19            |
| Coprobacter                    | 13.386  | 0.003872 | 0.08760931     | Coprobacter            |                 |                 |                 | 0.26            |                 | 0.33            |
| Enterococcus                   | 13.122  | 0.00438  | 0.08760931     | Enterococcus           |                 |                 |                 | 0.35            | 0.30            |                 |
| Akkermansia                    | 12.488  | 0.005885 | 0.08827822     | Akkermansia            |                 |                 |                 |                 |                 | 0.32            |
| Cerasioccus                    | 9.7093  | 0.02121  | 0.21206325     | Wilcoxon FDR           | ST1_ST2_FRD     | ST1_ST3_FRD     | ST1_ST4_FRD     | ST2_ST3_FRD     | ST2_ST4_FRD     | ST3_ST4_FRD     |
| Methanobrevibacter             | 9.9096  | 0.01935  | 0.21206325     | Anaerotruncus          | 0.046           | 0.675           | 0.378           | 0.046           | 0.000           | 0.064           |
| Turicibacter                   | 7.9359  | 0.04736  | 0.40590052     | Coprobacter            | 0.381           | 0.479           | 0.218           | 0.070           | 0.874           | 0.002           |
| Alistipes                      | 6.1041  | 0.1067   | 0.41185265     | Enterococcus           | 0.324           | 0.113           | 0.212           | 0.011           | 0.011           | 0.489           |
| Coproccoccus                   | 6.2937  | 0.09816  | 0.41185265     | Akkermansia            | 0.498           | 0.330           | 0.330           | 0.108           | 0.630           | 0.003           |
| Flavonifractor                 | 6.3657  | 0.09511  | 0.41185265     | Wilcoxon p-value       | ST1_ST2_p-value | ST1_ST3_p-value | ST1_ST4_p-value | ST2_ST3_p-value | ST2_ST4_p-value | ST3_ST4_p-value |
| Intestinibacter                | 6.3455  | 0.09596  | 0.41185265     | Anaerotruncus          | 0.023           | 0.675           | 0.315           | 0.016           | 0.000           | 0.043           |
| Intestinimonas                 | 5.9867  | 0.1123   | 0.41185265     | Coprobacter            | 0.254           | 0.399           | 0.109           | 0.023           | 0.874           | 0.000           |
| Lachnospiraceae_incertae_sedis | 6.4906  | 0.09003  | 0.41185265     | Enterococcus           | 0.270           | 0.056           | 0.141           | 0.002           | 0.004           | 0.489           |
| Oscillibacter                  | 6.6756  | 0.08299  | 0.41185265     | Akkermansia            | 0.415           | 0.220           | 0.183           | 0.036           | 0.630           | 0.001           |
| Prevotella                     | 5.8978  | 0.1167   | 0.41185265     |                        |                 |                 |                 |                 |                 |                 |
| Veillonella                    | 6.3553  | 0.09555  | 0.41185265     |                        |                 |                 |                 |                 |                 |                 |
| Victivallis                    | 6.3163  | 0.0972   | 0.41185265     |                        |                 |                 |                 |                 |                 |                 |
| Clostridium_IV                 | 5.2986  | 0.1512   | 0.50397086     |                        |                 |                 |                 |                 |                 |                 |
| Romboutsia                     | 5.1385  | 0.1619   | 0.51135872     |                        |                 |                 |                 |                 |                 |                 |
| Butyrivibrio                   | 4.8212  | 0.1854   | 0.556104       |                        |                 |                 |                 |                 |                 |                 |
| Clostridium_XIVb               | 4.3795  | 0.2233   | 0.63797444     |                        |                 |                 |                 |                 |                 |                 |
| Bifidobacterium                | 3.63    | 0.3043   | 0.77794008     |                        |                 |                 |                 |                 |                 |                 |
| Clostridium_sensu_stricto      | 3.5749  | 0.3112   | 0.77794008     |                        |                 |                 |                 |                 |                 |                 |
| Slackia                        | 3.6759  | 0.2987   | 0.77794008     |                        |                 |                 |                 |                 |                 |                 |
| Bilophila                      | 3.2824  | 0.3501   | 0.77800065     |                        |                 |                 |                 |                 |                 |                 |
| Paraprevotella                 | 3.3714  | 0.3378   | 0.77800065     |                        |                 |                 |                 |                 |                 |                 |
| Parasutterella                 | 3.3508  | 0.3406   | 0.77800065     |                        |                 |                 |                 |                 |                 |                 |
| Faecalicoccus                  | 3.1427  | 0.3701   | 0.79316966     |                        |                 |                 |                 |                 |                 |                 |
| Dorea                          | 3.0351  | 0.3862   | 0.79911351     |                        |                 |                 |                 |                 |                 |                 |
| Fusicatenibacter               | 2.9072  | 0.4062   | 0.8070867      |                        |                 |                 |                 |                 |                 |                 |
| Parabacteroides                | 2.7581  | 0.4304   | 0.8070867      |                        |                 |                 |                 |                 |                 |                 |
| Phascolarctobacterium          | 2.7779  | 0.4272   | 0.8070867      |                        |                 |                 |                 |                 |                 |                 |
| Actinomyces                    | 2.0854  | 0.5549   | 0.81065646     |                        |                 |                 |                 |                 |                 |                 |
| Bacteroides                    | 1.9885  | 0.5748   | 0.81065646     |                        |                 |                 |                 |                 |                 |                 |
| Blautia                        | 2.4777  | 0.4793   | 0.81065646     |                        |                 |                 |                 |                 |                 |                 |
| Butyrivibrio                   | 2.0518  | 0.5617   | 0.81065646     |                        |                 |                 |                 |                 |                 |                 |
| Desulfovibrio                  | 2.2451  | 0.5231   | 0.81065646     |                        |                 |                 |                 |                 |                 |                 |
| Dialister                      | 2.2836  | 0.5157   | 0.81065646     |                        |                 |                 |                 |                 |                 |                 |
| Gemmiger                       | 2.4881  | 0.4774   | 0.81065646     |                        |                 |                 |                 |                 |                 |                 |
| Gordonibacter                  | 1.895   | 0.5945   | 0.81065646     |                        |                 |                 |                 |                 |                 |                 |
| Odoribacter                    | 2.0744  | 0.5571   | 0.81065646     |                        |                 |                 |                 |                 |                 |                 |
| Roseburia                      | 2.3987  | 0.4939   | 0.81065646     |                        |                 |                 |                 |                 |                 |                 |
| Senegalimassilia               | 2.6365  | 0.4511   | 0.81065646     |                        |                 |                 |                 |                 |                 |                 |
| Streptococcus                  | 1.9562  | 0.5815   | 0.81065646     |                        |                 |                 |                 |                 |                 |                 |
| Anaerostipes                   | 1.6709  | 0.6434   | 0.81247994     |                        |                 |                 |                 |                 |                 |                 |
| Clostridium_XVIII              | 1.8068  | 0.6135   | 0.81247994     |                        |                 |                 |                 |                 |                 |                 |
| Lactobacillus                  | 1.7452  | 0.6269   | 0.81247994     |                        |                 |                 |                 |                 |                 |                 |
| Ruminococcus                   | 1.6416  | 0.65     | 0.81247994     |                        |                 |                 |                 |                 |                 |                 |
| Barnesiella                    | 1.4647  | 0.6904   | 0.84542768     |                        |                 |                 |                 |                 |                 |                 |
| Clostridium_XIVa               | 1.232   | 0.7453   | 0.84827889     |                        |                 |                 |                 |                 |                 |                 |
| Eggerthella                    | 1.3205  | 0.7243   | 0.84827889     |                        |                 |                 |                 |                 |                 |                 |
| Faecalibacterium               | 1.1714  | 0.7599   | 0.84827889     |                        |                 |                 |                 |                 |                 |                 |
| Holdemania                     | 1.1565  | 0.7635   | 0.84827889     |                        |                 |                 |                 |                 |                 |                 |
| Lactococcus                    | 1.2952  | 0.7303   | 0.84827889     |                        |                 |                 |                 |                 |                 |                 |
| Collinsella                    | 0.84468 | 0.8388   | 0.89275976     |                        |                 |                 |                 |                 |                 |                 |
| Olsenella                      | 0.85694 | 0.8358   | 0.89275976     |                        |                 |                 |                 |                 |                 |                 |
| Ruminococcus2                  | 0.80562 | 0.8481   | 0.89275976     |                        |                 |                 |                 |                 |                 |                 |
| Holdemania                     | 0.31254 | 0.9577   | 0.97388413     |                        |                 |                 |                 |                 |                 |                 |
| Sutterella                     | 0.35669 | 0.949    | 0.97388413     |                        |                 |                 |                 |                 |                 |                 |
| Sporobacter                    | 0.1711  | 0.9821   | 0.98211356     |                        |                 |                 |                 |                 |                 |                 |



**Table S10 -- Co-occurrence analysis network**

| Associated genera  | Edge              | Cooccurrence_method                  | interactionType | pval    | qval    |
|--------------------|-------------------|--------------------------------------|-----------------|---------|---------|
| Cloacibacillus     | OTU-ST04->OTU-304 | correl_spearman;dist_kullbackleibler | copresence      | 1.8E-11 | 2.4E-09 |
| Akkermansia        | OTU-23->OTU-ST04  | correl_spearman;dist_kullbackleibler | copresence      | 4.2E-05 | 1.4E-03 |
| Coprobacter        | OTU-ST04->OTU-161 | correl_spearman;dist_kullbackleibler | copresence      | 2.1E-03 | 4.7E-02 |
| Akkermansia        | OTU-23->OTU-ST03  | correl_spearman;dist_kullbackleibler | mutualExclusion | 2.9E-07 | 1.9E-05 |
| Methanobrevibacter | OTU-ST04->OTU-78  | correl_spearman;dist_kullbackleibler | copresence      | 3.9E-06 | 1.8E-04 |
| Anaerotruncus      | OTU-ST04->OTU-290 | correl_spearman;dist_kullbackleibler | copresence      | 1.8E-03 | 4.7E-02 |

Table S11 -- Distance based redundancy analysis (dbRDA) results

| CAP Variable                                | stepRDA | Cumulative R2 | group               | CAP r2     | FDR         | exclusion from plot |
|---------------------------------------------|---------|---------------|---------------------|------------|-------------|---------------------|
| Status: ST1, ST2, ST3, ST4 and non-carriers | 1       | 0.031346      | Blastocystis        | 0.03542608 | 0.00475     | included            |
| Bristol stool score                         | 2       | 0.040972      | Bowel               | 0.008065   | 0.00475     | included            |
| A06AD15_65 (osmotic laxatives)              | 3       | 0.050676      | Medication          | 0.00757658 | 0.00475     | included            |
| Age                                         | 4       | 0.057972      | Anthropometrics     | 0.00797695 | 0.00475     | included            |
| Relative abundance of Blastocystis          | 5       | 0.064948      | Blastocystis        | 0.02241826 | 0.00475     | included            |
| J01CA04 (amoxicillin)                       | 6       | 0.071039      | Medication          | 0.00851593 | 0.00475     | included            |
| Bread type preference                       | 7       | 0.076857      | Dietary Information | 0.00923985 | 0.00475     | included            |
| Magnesium supplement                        | 8       | 0.082257      | Dietary Information | 0.00341009 | 0.02955556  | included            |
| HDL cholesterol                             | 9       | 0.087075      | Blood Parameters    | 0.00369955 | 0.006608696 | included            |
| Time since previous relief                  | 10      | 0.091107      | Bowel               | 0.00621267 | 0.00475     | included            |
| R06AX28 (rupatadine)                        | 11      | 0.094557      | Medication          | 0.00210583 | 0.057       | included            |
| Fruits (freq. past week)                    | 12      | 0.097408      | Dietary Information | 0.00396126 | 0.006608696 | included            |
| Shift work                                  | 13      | 0.099614      | Lifestyle           | 0.00225304 | 0.038       | included            |
| Gastroenteritis (other treatment)           | 14      | 0.101915      | Health              | 0.0030723  | 0.018424242 | included            |
| Height                                      | 15      | 0.104136      | Anthropometrics     | 0.00407335 | 0.006608696 | included            |
| Red blood cell counts                       | 16      | 0.106342      | Blood Parameters    | 0.00850329 | 0.00475     | included            |
| Beer consumption                            | 17      | 0.108651      | Dietary Information | 0.00386302 | 0.010857143 | included            |
| Carriers or non-carriers                    |         | 0.108651      | Blastocystis        | 0.03458764 | 0.00475     | included            |
| Presence of ST4                             |         | 0.108651      | Blastocystis        | 0.01228901 | 0.00475     | included            |
| Glomerular filtration rate                  |         | 0.108651      | Health              | 0.0076032  | 0.00475     | included            |
| Presence of ST3                             |         | 0.108651      | Blastocystis        | 0.00705173 | 0.00475     | included            |
| Hemoglobin                                  |         | 0.108651      | Blood Parameters    | 0.00546469 | 0.00475     | included            |
| Gender                                      |         | 0.108651      | Anthropometrics     | 0.0047907  | 0.006608696 | included            |
| Presence of ST1                             |         | 0.108651      | Blastocystis        | 0.00430263 | 0.00475     | included            |
| Presence of ST2                             |         | 0.108651      | Blastocystis        | 0.00422679 | 0.006608696 | included            |
| L04AX01 (azathioprine)                      |         | 0.108651      | Medication          | 0.00406195 | 0.010857143 | included            |
| J01CR02 (amoxicillin and enzyme inhibitor)  |         | 0.108651      | Medication          | 0.00405839 | 0.00475     | included            |
| L04AB (TNF-alpha inhibitors)                |         | 0.108651      | Medication          | 0.0040441  | 0.010857143 | included            |
| Triglycerides                               |         | 0.108651      | Blood Parameters    | 0.00364601 | 0.006608696 | included            |
| Coffee (days since consumed)                |         | 0.108651      | Dietary Information | 0.00350997 | 0.0095      | included            |
| Sleep (hours/day)                           |         | 0.108651      | Lifestyle           | 0.00346966 | 0.006608696 | included            |
| BetaGlobulines.g.L                          |         | 0.108651      | Blood Parameters    | 0.00333459 | 0.015724138 | included            |
| Chocolate type preference                   |         | 0.108651      | Dietary Information | 0.00318647 | 0.010857143 | excluded            |
| Ulcerative colitis                          |         | 0.108651      | Health              | 0.00306962 | 0.018424242 | excluded            |
| Number of breakfasts past week              |         | 0.108651      | Dietary Information | 0.00301261 | 0.01716129  | excluded            |
| Uric acid                                   |         | 0.108651      | Blood Parameters    | 0.00287959 | 0.020117647 | excluded            |
| BMI                                         |         | 0.108651      | Anthropometrics     | 0.00287249 | 0.01716129  | excluded            |
| N03AE01 (clonazepam)                        |         | 0.108651      | Medication          | 0.00259617 | 0.023885714 | excluded            |
| HOMA-IR                                     |         | 0.108651      | Blood Parameters    | 0.00246837 | 0.057422222 | excluded            |
| Fruits (days since consumed)                |         | 0.108651      | Dietary Information | 0.00224397 | 0.034918919 | excluded            |
| Gamma-glutamyltransferase                   |         | 0.108651      | Blood Parameters    | 0.00200026 | 0.057       | excluded            |
| Smoker                                      |         | 0.108651      | Lifestyle           | 0.00198467 | 0.048195122 | excluded            |
| A07EC02 (mesalazine)                        |         | 0.108651      | Medication          | 0.00187954 | 0.064434783 | excluded            |
| Spirits consumption                         |         | 0.108651      | Dietary Information | 0.00183624 | 0.0456      | excluded            |
| Cigarettes (average/day past 2 months)      |         | 0.108651      | Lifestyle           | 0.00179798 | 0.054285714 | excluded            |
| Smoking with inhalation                     |         | 0.108651      | Lifestyle           | 0.00173022 | 0.042871795 | excluded            |
| Q10 supplement                              |         | 0.108651      | Dietary Information | 0.00172219 | 0.077490196 | excluded            |
| Creatinine                                  |         | 0.108651      | Blood Parameters    | 0.00166504 | 0.069531915 | excluded            |
| Alcohol (average past week)                 |         | 0.108651      | Dietary Information | 0.00160862 | 0.06992     | excluded            |
| Irritable bowel syndrome                    |         | 0.108651      | Health              | 0.00156206 | 0.069666667 | excluded            |
| Alfa-2-globuline                            |         | 0.108651      | Blood Parameters    | 0.00150732 | 0.084603774 | excluded            |
| G03AA12 (drospirenone and ethinylestradiol) |         | 0.108651      | Medication          | 0.00146153 | 0.095345455 | excluded            |
| Work days per week                          |         | 0.108651      | Lifestyle           | 0.00143158 | 0.06992     | excluded            |
| Blood urea                                  |         | 0.108651      | Blood Parameters    | 0.00141385 | 0.078923077 | excluded            |
| Bloating (days past week)                   |         | 0.108651      | Bowel               | 0.00127067 | 0.094296296 | excluded            |
| Alanine Aminotransferase                    |         |               | Blood Parameters    | 0.0012117  | 0.114       | excluded            |
| N06AX16 (venlafaxine)                       |         |               | Medication          | 0.00114837 | 0.114       | excluded            |
| Chronic fatigue syndrome                    |         |               | Health              | 0.00120843 | 0.114       | excluded            |
| Working hours (hours/week)                  |         |               | Lifestyle           | 0.00109864 | 0.124949153 | excluded            |
| Food allergy                                |         |               | Health              | 0.00098884 | 0.130466667 | excluded            |
| Constipation (days past week)               |         |               | Bowel               | 0.00093254 | 0.163213115 | excluded            |
| Hip circumference                           |         |               | Anthropometrics     | 0.00080475 | 0.165483871 | excluded            |
| Meat (average past week)                    |         |               | Dietary Information | 0.00078915 | 0.173714286 | excluded            |
| Soda (freq. past week)                      |         |               | Dietary Information | 0.00073084 | 0.1983125   | excluded            |
| G03DA04 (progesterone)                      |         |               | Medication          | 0.00063511 | 0.220984615 | excluded            |
| J01XE01 (nitrofurantoin)                    |         |               | Medication          | 0.00049392 | 0.228       | excluded            |
| Weight perception                           |         |               | Anthropometrics     | 0.00045762 | 0.253333333 | excluded            |
| Plan to change weight                       |         |               | Anthropometrics     | 0.00047551 | 0.253333333 | excluded            |
| Soy products (average past week)            |         |               | Dietary Information | 0.00054507 | 0.253333333 | excluded            |
| Sick leave (freq. past week)                |         |               | Lifestyle           | 0.00036343 | 0.287714286 | excluded            |
| G03CA04_CC06 (estrogens)                    |         |               | Medication          | 0.0002256  | 0.317915493 | excluded            |
| Mean corpuscular hemoglobin concentration   |         |               | Blood Parameters    | 0.00022409 | 0.329333333 | excluded            |
| Childhood residence type                    |         |               | Lifestyle           | 9.90E-05   | 0.386246575 | excluded            |
| Creatine Kinase                             |         |               | Blood Parameters    | -5.94E-05  | 0.461135135 | excluded            |
| Pets (past 3 months)                        |         |               | Lifestyle           | -0.0004384 | 0.664746667 | excluded            |
| Working start age                           |         |               | Lifestyle           | -0.0012125 | 0.995       | excluded            |
